1 **IL-32 producing CD8<sup>+</sup> memory T cells and Tregs define the IDO1 / PD-L1 niche in**  
2 **human cutaneous leishmaniasis skin lesions.**

3

4 Nidhi S. Dey<sup>1</sup>, Shoumit Dey<sup>1</sup>, Naj Brown<sup>1</sup>, Sujai Senarathne<sup>2</sup>, Luiza Campos Reis<sup>3,¥</sup>, Ritika  
5 Sengupta<sup>4</sup>, Jose Angelo L. Lindoso<sup>5,6</sup>, Sally James<sup>7</sup>, Lesley Gilbert<sup>7</sup>, Mitali Chatterjee<sup>4</sup>, Hiro  
6 Goto<sup>3</sup>, Shalindra Ranasinghe<sup>2</sup> and Paul M. Kaye<sup>1\*</sup>

7

8 <sup>1</sup>York Biomedical Research Institute, Hull York Medical School, University of York, UK.

9 <sup>2</sup>Department of Parasitology, Faculty of Medical Sciences, University of Sri  
10 Jayewardenepura, Sri Lanka.

11 <sup>3</sup>Department of Preventive Medicine, Instituto de Medicina Tropical de São Paulo, Faculdade  
12 de Medicina, Universidade de São Paulo, Brazil.

13 <sup>4</sup>Department of Pharmacology, Institute of Postgraduate Medical Education and Research,  
14 Kolkata, India.

15 <sup>5</sup>Secretaria de Saúde do Estado de São Paulo, Instituto de Infectologia Emílio Ribas, São  
16 Paulo, SP, Brasil

17 <sup>6</sup>University of São Paulo, Faculty of Medicine, Department of Infectious and Parasitic  
18 Diseases, São Paulo, SP, Brazil.

19 <sup>7</sup>Technology Facility, Department of Biology, University of York, York, YO10 5DD

20

21 \*Correspondence: Paul M. Kaye, [paul.kaye@york.ac.uk](mailto:paul.kaye@york.ac.uk)

22

23 <sup>¥</sup> Current address: Escuela Profesional de Medicina Humana, Facultad de Medicina,  
24 Universidad Nacional Toribio Rodríguez de Mendoza de Amazonas, Chachapoyas, Peru.

25

26 **Key words:** Human cutaneous leishmaniasis, Host directed therapy, skin, IL-32, CD8

27 memory T cells, Regulatory T cells, Prognosis, Spatial Transcriptomics, IDO1, PD-L1,

28 myeloid cells.

29 Total words = 4371 (excluding methods, abstract, figure legends and references)

30

31 **Abstract**

32 Human cutaneous leishmaniasis (CL) is characterised by chronic skin pathology.  
33 Experimental and clinical data suggest that immune checkpoints (ICs) play a crucial role in  
34 disease outcome but the cellular and molecular niches that facilitate IC expression during  
35 leishmaniasis are ill-defined. We previously showed that in Sri Lankan patients with CL,  
36 indoleamine 2,3-dioxygenase 1 (IDO1) and programmed death-ligand 1 (PD-L1) are enriched  
37 in lesion skin and that reduced PD-L1 expression early after treatment onset predicted cure  
38 rate following antimonial therapy. Here, we use spatial cell interaction mapping to identify  
39 IL-32-expressing CD8<sup>+</sup> memory cells and regulatory T cells as key components of the IDO1 /  
40 PD-L1 niche in Sri Lankan CL patients and in patients with distinct forms of dermal  
41 leishmaniasis in Brazil and India. Furthermore, the abundance of IL-32<sup>+</sup> cells and IL-  
42 32<sup>+</sup>CD8<sup>+</sup> T cells at treatment onset was prognostic for rate of cure in Sri Lankan patients.  
43 This study provides a unique spatial perspective on the mechanisms underpinning IC  
44 expression during CL and a novel route to identify additional biomarkers of treatment  
45 response.

46

## 47 Graphical Abstract

48

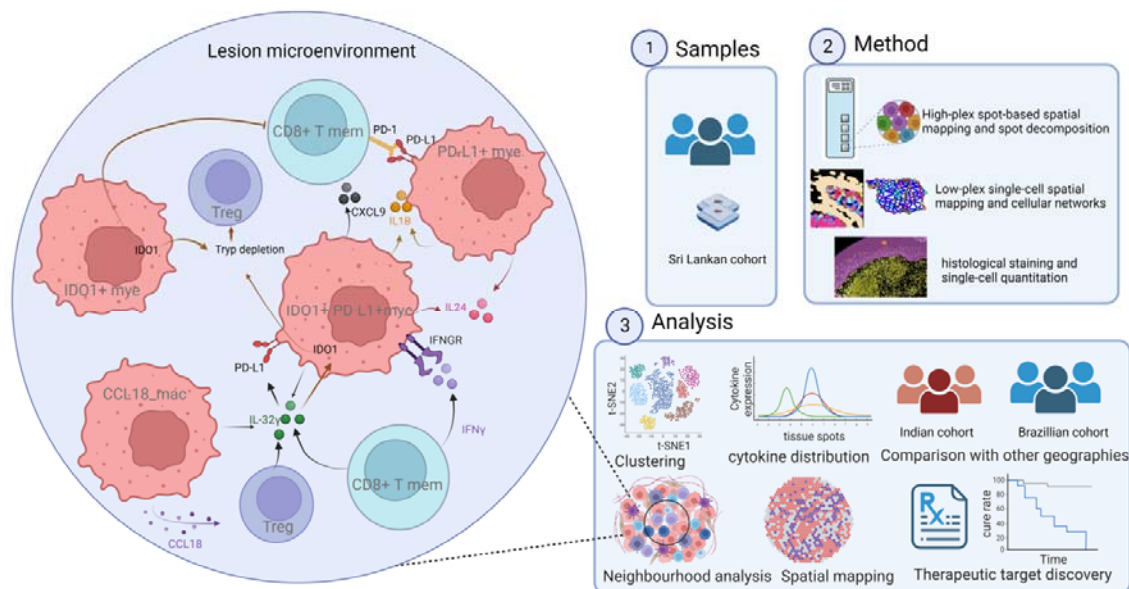

49

## 50 Introduction

51 Cutaneous leishmaniasis (CL) is caused by protozoan parasites of the genus *Leishmania* and  
52 exhibits a wide spectrum of clinical presentations determined at least in part by the host  
53 immune response. *Leishmania* are intracellular parasites of myeloid cells, predominantly  
54 macrophages, monocytes, and dendritic cells<sup>1,2,3</sup>. Consequently, protective immunity is  
55 largely cell-mediated, with effector CD4<sup>+</sup> and CD8<sup>+</sup> T cells producing cytokines (e.g. IFN $\gamma$ )  
56 that activate myeloid cell-intrinsic leishmanicidal activity<sup>4,5</sup>. Over-exuberant or persistent  
57 effector T cell function at the site of infection can lead to tissue damage and progression of  
58 clinical disease despite a reduction in parasite load<sup>6</sup>. Conversely, parasite persistence has  
59 been attributed to a combination of dysregulation of the T cell response and parasite-  
60 mediated subversion of epigenetic and transcriptional pathways that control macrophage  
61 polarisation and activation<sup>7</sup>.

62  
63 Studies in animal models have elegantly demonstrated the impact of dichotomy in CD4<sup>+</sup> T  
64 cell responses to *Leishmania*. For example, enhanced CD4<sup>+</sup> Th2 responses<sup>8</sup> are responsible  
65 for the genetically determined susceptibility of BALB/c mice to *L. major* infection and IL-4-  
66 driven alternatively activated macrophages favour parasite survival<sup>9</sup>. This dichotomy in  
67 CD4<sup>+</sup> T cell response has some parallels in human leishmaniasis. Strong Th1 responses are  
68 associated with resolution of infection in CL patients infected with *L. donovani* in Sri Lanka<sup>9</sup>  
69 and with *L. major* in Iran<sup>10</sup>, whereas increased lesional IL-4 was observed in Sri Lankan  
70 patients with a poor response to treatment<sup>11</sup>. However, chronic stimulation of CD4<sup>+</sup> Th1  
71 cells leads to differentiation into Tr1 cells producing IL-10, a well-known inhibitor of IFN $\gamma$ -  
72 mediated NO production<sup>12</sup>. Regulatory T cells producing IL-10 have also been associated  
73 with parasite latency, treatment resistance, and disease relapse in humans<sup>13,14</sup>. In *L.*  
74 *braziliensis* infection, chronic lesion development occurs in the face of relatively low parasite

75 burden and has been most commonly associated with an over-exuberant cytolytic CD8<sup>+</sup> T  
76 cell response <sup>15</sup>.

77

78 In leishmaniasis <sup>16</sup> as well as many other infectious <sup>17</sup> and non-infectious <sup>18,19</sup> diseases, the  
79 role of immune checkpoints (ICs) as regulators of T cell effector function and disease  
80 outcome has been well described. For example, indoleamine-2,3-dioxygenase (IDO1) is a  
81 metabolic IC molecule expressed in response to inflammatory insults by macrophages <sup>20</sup>,  
82 dendritic cells <sup>21</sup> and B cells <sup>22</sup> and catalyses degradation of tryptophan <sup>23</sup>. Tryptophan  
83 starvation in T cells leads to proliferation arrest <sup>23</sup>, anergy <sup>24</sup> or regulatory phenotypes <sup>25</sup>,  
84 facilitating tumour immune escape <sup>26</sup> or in the case of CL lesion progression <sup>27</sup>. Similarly,  
85 programmed death ligand 1 (PD-L1; *CD274*) is expressed by myeloid cells upon activation  
86 via LPS/IFN- $\gamma$  or IL-4 and when bound to PD-1 on T cells inhibits activation and promotes  
87 IL-10 expression <sup>28</sup>. These and other ICs have become invaluable prognostic and therapeutic  
88 targets in cancer. Co-expression of PD-L1 and IDO1 in resected non-small cell lung cancer  
89 (NSCLC) may predict survival outcome <sup>29</sup> and triple blockade of IDO1, PD-L1 and  
90 MAPK/ERK kinase has been proposed as therapy in NSCLC <sup>30</sup>. In a similar vein, an  
91 immunomodulatory vaccine targeting IDO1<sup>+</sup>PD-L1<sup>+</sup> myeloid cells is under development for  
92 metastatic melanoma <sup>31</sup>. In addition to modulating the natural course of disease, ICs may  
93 also play a role in tempering the efficacy of conventional but immune-dependent anti-  
94 infectives and anti-cancer drugs. For example, we recently demonstrated that PD-L1 and  
95 IDO1 are enriched in skin lesions of CL patients in Sri Lanka and that a decrease in PD-L1  
96 expression early after treatment onset was predictive of rate of cure following treatment with  
97 sodium stibogluconate, a well-known immune dependent drug <sup>32</sup>.

98 Despite many examples of disease-associated aberrant expression of IDO1 and PD-L1 <sup>33, 34, 35,</sup>  
99 <sup>36, 37, 38</sup>, our understanding of the cellular and molecular pathways that regulate expression of

100 the ICs is largely derived from in vitro studies. Multiple cytokines and inflammatory signals  
101 can induce IDO1<sup>39,40</sup> and PD-L1<sup>41,42</sup> expression on human monocytes and DCs, including  
102 IFN $\gamma$ , TNF, TGF- $\beta$ , IL-6, IL-10, IL-27, IL-32, PAMPs/DAMPs, and PGE2. IDO1 and PD-  
103 L1 are also induced by intracellular infection with *Leishmania*<sup>32,43,44</sup> and other pathogens<sup>45,</sup>  
104 <sup>46</sup> suggesting that subversion of host cell function by manipulation of ICs is a conserved  
105 mechanism across pathogen evolution. There is currently little understanding, however, of  
106 how these ICs are regulated in the complex spatial microenvironments associated with  
107 chronic tissue pathology that result from either infection or cancer.

108

109 Here, we have combined multiple spatial methodologies to define the cellular and  
110 transcriptomic composition of niches containing IDO1<sup>+</sup> and PD-L1<sup>+</sup> myeloid cells in tissue  
111 biopsies from Sri Lankan CL patients and patients with other diverse forms of dermal  
112 leishmaniasis. Our results reveal diversity in niche composition and localisation, but identify  
113 IL-32<sup>+</sup> CD8<sup>+</sup> T cells and IL-32<sup>+</sup> Tregs as common attributes of these immunoregulatory  
114 microenvironments.

115

## 116 **Results**

### 117 ***CD274* and *IDO1* localise to myeloid cell-rich niches**

118 To understand the cellular and molecular architecture of human CL lesions, we conducted  
119 Visium spatial transcriptomics on FFPE sections from 6 patients (P1-P6; **Supplementary**  
120 **Table 1**) presenting with a papular and/or ulcerative plaque lesion typical of Sri Lankan CL  
121 (SL\_CL) (**Fig.1a** and **Extended Data Fig.1a**). H&E staining and immunohistochemistry revealed  
122 dense cellular infiltration and parasitism in the papillary dermis (**Fig.1b** and **Extended Data**  
123 **Fig.1b**). A total of 2418 Visium spots (median of 4104 gene counts per spot; **Extended Data**  
124 **Fig.1c**) were coloured by cluster identities and visualised in UMAP space, with

125 representation from all 6 patients in each cluster (**Fig.1c**). 11 high level clusters were  
126 identified and annotated namely My1, My2 and My3 (Myeloid rich), B/Fib (cluster rich in B  
127 and Fibroblast transcripts), TL (T lymphocyte rich), KC1 (Keratinocyte 1 rich), Fib  
128 (Fibroblast 1 rich), KC2 (Keratinocyte 2 rich), B (B cell rich), and Endo (Endothelial cell  
129 rich) and an uncharacterised cluster (mix) (**Fig. 1d,e**). Spatial mapping generated a coarse  
130 transcriptomic map reflecting underlying tissue morphology (**Fig. 1f** and **Extended Data Fig.**  
131 **1b,d**). The three myeloid rich clusters had distinct positioning and gene expression  
132 signatures. My1 (*SELENOP*<sup>+</sup>) and My2 (*CCL18*<sup>+</sup>) were located in the papillary dermis near  
133 the epidermal-dermal junction (herein referred to as “lesion core”), My1 also contained B  
134 cells (*IGHA1*, *IGHG2*, *IGKC*) (**Supplementary Fig. 1a**). My1 and My2 were enriched for  
135 mRNAs encoding i) S100 proteins (*S100A8*, *S100A9*) suggestive of neutrophils, monocytes  
136 and DC<sup>47</sup>; ii) metallothionein genes (*MT1H*, *MT1G*, *MT1X* and *MT2A*) and *SLC39A8*,  
137 suggesting altered metal ion homeostasis; and iii) *CCL18*, a T cell chemoattractant <sup>48</sup>  
138 (**Supplementary Fig. 1b**). My3 (*CHIT1*<sup>+</sup>) was associated with a T lymphocyte-rich cluster  
139 (*CCL19*<sup>+</sup>) deeper in the dermis (**Extended Data Fig. 1d**). *IDO1* and *CD274* transcripts  
140 mapped to the lesion core and to the T cell rich region (**Fig. 1g,h**, and **Supplementary Fig.**  
141 **2a,b**) and to the My1, My2 and My3 clusters (**Fig. 1i**). My2 was also enriched for other  
142 immune regulators including *SIGLEC10*<sup>49</sup>, *VSIG4*<sup>50</sup> and *CD300E*<sup>51</sup> (**Supplementary Fig.**  
143 **1b**).

144

145 Using a publicly available scRNAseq dataset<sup>38</sup> and the Cell2Location<sup>52</sup> prediction tool, we  
146 projected estimated abundances of 40 cell types (**Extended Data Fig. 2**). Although some  
147 interpatient heterogeneity was observed, macrophages (*FCGR2A*, *F13A1*, *NR4A1*, *NR4A2*,  
148 *KLF4*), helper T cells (*CD4*, *IL7R*, *CD40LG*, *PTGER4*), regulatory T cells (*FOXP3*, *TIGIT*,  
149 *BATF*, *CTLA4*), natural killer cells (*KLRD1*, *GZMB*, *PRF1*, *GZMB*, *NKG7*), and cytotoxic T



150 cells (*CD8A*, *CD8B*) were most highly represented. (**Extended Data Fig. 2a**). My1, My2  
151 and My3 clusters contained Tc, Th, Treg and NK cells, myeloid DC (DC2; *CD68*, *NR4A1*,  
152 *NR4A2*, *CLEC10A*, *FCGR2A*, *CD83<sup>low</sup>*), ILC2 (*IL7R*, *PTGDR2*, *GATA3*), Macro1(*MARCO*,  
153 *CD163*, *C1QB*, *FCGR2A*), Macro2, monocytes (*CD14*, *IL1B*) and ILC1/NK (*KLRB1*, *XCL1*,  
154 *XCL2*, *TNFRSF18*, *TNFRSF11*, *FCER1G*, *KIT*) in differing proportions (**Extended Data Fig.**  
155 **2b-1**). Although Ig transcripts were found in these clusters, formal identification of B cells /  
156 plasma cells was not possible using the Reynolds et al reference data set<sup>38</sup>.

157

### 158 **Mature dendritic cells express abundant *CD274* and *IDO1* mRNA**

159 To overcome limitations of cellular deconvolution, we next applied single cell spatial  
160 transcriptomics. Using Nanostring CosMx<sup>53</sup>, we analyzed 115,157 single cells from 20 fields  
161 of view (FOVs) derived from four patients (**P3-P6**; **Extended Data Fig. 3a-e**)  
162 (**Supplementary Table 1**) and identified 22 cell clusters (**Fig.2a** and **Extended Data Fig.**  
163 **3f,g**). Cells with myeloid signatures were most abundant in the papillary dermis (**Fig. 2b**),  
164 supporting our Visium analysis. We also identified T cells near the dermal and epidermal  
165 boundary, flanked by fibroblasts and B cells in the lesion core. Deeper in the dermis, T cells  
166 along with scattered macrophages were dominant (**Fig.2b**). The localisation of additional cell  
167 populations is shown in **Extended Data Fig. 4a-d**. We next subclustered all myeloid cells  
168 (mac, mac2, mDC, pDC, monocytes, and neutrophils) to obtain 13 sub-populations (**Fig. 2c,d**  
169 and **Extended Data Fig. 4e,h**). When ranked by *CD274* and *IDO1* mRNA abundance  
170 (**Extended Data Fig. 4i,j**), mature dendritic cell cluster DC3 was identified as having the  
171 highest proportion of *IDO1<sup>hi</sup> CD274<sup>hi</sup>* cells. Smaller proportions of many other myeloid cell  
172 populations also expressed these ICs. DC3 mapped to the lesion core and the deeper T cell  
173 rich regions of the dermis (**Fig.2e**) and expressed mRNA for other immunoregulatory  
174 molecules (*CD40* and *PDCD1LG2*; PD-L2; **Fig. 2d**).

175 ***CD274* and *IDO1* mRNA abundance correlates with distinct cytokines and chemokines**

176 To gain insights into the pathways leading to *IDO1* and PD-L1 expression, we first sought to  
177 identify cytokine expression in niches where *CD274*<sup>+</sup> and *IDO1*<sup>+</sup> cells were abundant. Due to  
178 the limited cytokine / chemokine coverage of the CosMx gene panel, we reverted for this  
179 analysis to our Visium data. We classified Visium spots into four classes: *CD274*<sup>hi</sup>*IDO1*<sup>lo</sup>  
180 (*CD274* spots), *CD274*<sup>lo</sup>*IDO1*<sup>hi</sup> (*IDO1* spots), *CD274*<sup>hi</sup>*IDO1*<sup>hi</sup> (*IDO1/CD274* spots) or  
181 *CD274*<sup>lo</sup> *IDO1*<sup>lo</sup> (rest of the spots) and mapped their distributions and predicted cell type  
182 abundances (**Fig. 3a,b** and **Extended Data Fig. 5a-d**). As compared to *CD274* spots,  
183 *IDO1/CD274* spots and *IDO1* spots had a higher monocyte abundance and higher cytotoxic T  
184 cell : helper T cell ratio. We performed differential expression analysis to identify cytokines,  
185 chemokines, their receptors, and ICs that were significantly different across these classes  
186 (**Extended Data Fig. 5e**) and observed four distinct patterns of gene expression (**Fig. 3c-k**  
187 and **Extended Data Fig. 5f,g**). *CCL18*, *IL24*, *IL1B*, *TNFRSF6B*, *IFNGR2*, *CXCL9* and *IL32*  
188 were highly expressed in *IDO1/CD274* spots and to a lesser degree in *IDO1* spots in the  
189 lesion core, with *CXCL9* and *IL32* also found in the T cell rich hypodermis (**Fig. 3d-g**). The  
190 homeostatic chemokines *CXCL12*<sup>54</sup> and *CXCL14*<sup>55</sup> showed a reciprocal distribution being  
191 associated with spots lacking *IDO1* and *CD274* (**Fig. 3h,i**). *CCL19* (**Fig. 3j**), *CCR7*,  
192 *CXCL13* and *LTB* (**Fig. 3k**) were most highly expressed in *CD274* spots in T cell rich areas.  
193 Amongst anti-leishmanial effector and regulatory cytokines<sup>1</sup>, *TNF* and *IFNG* were mostly  
194 concentrated in the lesion core while *TGFBI* was widespread across the tissue (**Extended**  
195 **Data Fig. 5h-j**).

196

197 **Neighbourhood analysis of *CD274* and *IDO1* expressing cells**

198 To identify cellular interactions contributing to the *CD274* and *IDO1* niches, we similarly  
199 classified myeloid cells in our CosMx dataset into 4 classes by *IDO1* and *CD274* expression

200 **(Fig. 4a,b and Extended Data Fig.6a,b)**.  $CCL18^+$  macrophages (*CCL18*, *MT2A*, *CD14*,  
201 *SI00A9*, *C1QB*, *CD68*, *LYZ*) were the predominant cell type across all three classes (**Fig. 4c**  
202 and **Extended Data 6a,b**). We then used Delaunay triangulation in Giotto to construct a pan  
203 spatial network based on cell centroid physical distances<sup>56</sup>. We observed that each cell had  
204 4-8 close “neighbours” (**Extended Data Fig. 6c,d**). Using this framework, we assigned  
205  $IDO1^+$ mye,  $CD274^+$ mye and  $IDO1^+/CD274^+$ mye cells as 'source' cells or as “both”  
206 neighbour and source (**Fig.4d, e and Extended Data Fig.6e,f**) and visualised source-  
207 neighbour or both-neighbour abundance using the UpSetR tool<sup>57</sup> (**Fig.4f and Extended Data**  
208 **Fig. 6 g,h**). This analysis revealed a consistent neighbourhood composition, comprising other  
209  $IDO1^+$  or  $CD274^+$  myeloid cells,  $CD274^+IDO1^-CCL18^+$  macrophages, CD8 memory T cells  
210 and regulatory T cells (Tregs) (**Fig. 4g-i**). For orthogonal validation, we performed  
211 immunostaining for PD-L1, IDO1, and CD8 proteins in biopsies where sufficient tissue was  
212 available (n=23 SL-CL patients), demonstrating CD8<sup>+</sup> T cells in close proximity to IDO1 and  
213 PD-L1 positive cells (**Fig. 4j**). Employing bespoke image analysis pipelines, we created  
214 image masks at distances of 25, 50, and 100 microns from  $IDO1^+$ ,  $PD-L1^+$  (**Extended Data**  
215 **Fig. 6i,j**) and  $IDO1^+PD-L1^+$  cells (**Fig. 4k**), revealing that the majority of CD8<sup>+</sup> T cells were  
216 located within 25 $\mu$ m of such cells and confirming them as immediate neighbours.  
217  
218 We then examined the phenotypes of source and neighbouring cells with respect to cytokines  
219 and chemokines identified above as co-enriched in *CD274* and *IDO1* niches (**Fig. 3c**). *IL32*  
220 expression was significantly higher in CD8<sup>+</sup> T memory cells and Tregs whereas *CXCL9* and  
221 *CCL18* were predominantly expressed by other myeloid cells including those that also  
222 expressed *CD274* and *IDO1* (**Fig. 4l-n**). In contrast, *IL24*, *IFNGR2* and *IL1B* were primarily  
223 expressed by  $IDO1^+$  and  $CD274^+$  and source myeloid cells (**Fig 4n-q**). Similar patterns were  
224 observed for neighbours of *CD274* and *IDO1* single positive cells (**Extended Data Fig. 6k,l**).

225 Hence, in Sri Lankan CL lesions, CD8<sup>+</sup> memory T cells and Tregs (**Extended Data Fig. 6m**)  
226 represent the most common neighbours of CD274<sup>+</sup> IDO1<sup>+</sup> cells and are a major source of the  
227 CD274<sup>-</sup> and IDO1<sup>-</sup> inducing cytokine IL-32. Since both IL32 $\beta$  and IL32 $\gamma$  isoforms can  
228 induce either IDO1 or/and PD-L1 in macrophages<sup>58, 59, 60</sup>, and IL-32 $\gamma$  expression has been  
229 reported in patients with *L. (V.) braziliensis* infection<sup>61</sup>, we investigated which isoform was  
230 expressed in SL\_CL lesions. Quantitative RT-PCR confirmed that IL32 $\gamma$  and IL32 $\beta$  were the  
231 most highly upregulated isoforms in lesion compared to healthy skin (**Extended Data Fig.**  
232 **7**).

233

234 **IL32 is a common spatial correlate of CD274 and IDO1 expression.**

235 Although differing mechanisms of immunopathology may occur across the leishmaniasis  
236 disease spectrum, IDO1 and PD-L1 have been consistently identified in transcriptomic  
237 studies<sup>32, 62, 63, 64, 65</sup>. To assess whether the CD274 and IDO1 niche composition we  
238 identified in SL\_CL patients was also seen in other forms of dermal leishmaniasis, we  
239 performed Visium analysis on biopsies from four Brazilian patients with *L. (V.) braziliensis*  
240 CL (**Fig. 5a, b, Extended Data Fig. 8a, b and Supplementary Table 2**) and two patients  
241 from India with *L. donovani* post kala-azar dermal leishmaniasis (PKDL) (**Fig. 5c,d,**  
242 **Extended Data Fig. 8c, d and Supplementary Table 3**). Histologically, we observed a  
243 diffuse cellular infiltrate in these samples (**Fig. 5b,d and Extended Data Fig. 8b,d**), and  
244 CD274 and IDO1 expression showed similar patterns within the papillary dermis (**Fig. 5e,f**  
245 and **Extended Data Fig. 8e-g**). Using the same analysis strategy (**Fig. 5g and Extended**  
246 **Data Fig. 8h**), we found that IDO1<sup>hi</sup> CD274<sup>hi</sup> spots were restricted mainly to the upper  
247 dermis (**Fig. 5h,i and Extended Data Fig. 8i, j**). IL32 and CXCL9 were strongly expressed  
248 in all IDO1/ CD274 spots in both datasets along with other cytokines (**Extended Data Fig.**  
249 **9a-f**). Based on the top 50 correlates (top 10 shown in **Extended Data Fig. 9g-j**), we

250 identified signatures associated with *IDO1* (*IL32*, *GBP5*, *GZMB*, *LYZ*, *SOD2*, *IFI30*, *FTH1*,  
251 *GBP1*, *SRGN*, *CTSS*; **Fig. 5j**) and *CD274* (*IL32*, *LYZ*, *WARS*, *IFI30*, *FTH1*, *GBP1*, *FCER1G*;  
252 **Fig. 5k**) expression across all three disease forms. A subset of 5 genes emerged as a core  
253 correlate across all three datasets, namely *IL32*, *LYZ* (Lysozyme), *GBP1* (Guanylate-Binding  
254 Protein 1), *IFI30* (lysosomal thiol reductase) and *FTH1* (Ferritin heavy chain 1).

255

### 256 **IL-32 is a predictive biomarker for rate of cure in Sri Lankan CL**

257 As IL-32 has been previously shown to induce IDO1 and PD-L1 expression and the latter has  
258 been related to treatment outcome, we investigated the association between IL-32 expression  
259 and treatment outcome (**Fig. 6**). Quantitative analysis of IL-32 staining in the dermis (n=25  
260 SL\_CL patients; **Fig. 6a** and **Supplementary Table 1**) allowed stratification into two patient  
261 groups (IL-32<sup>hi</sup> or IL-32<sup>lo</sup>) based on geometric mean number of IL-32<sup>+</sup> cells / mm<sup>2</sup> (**Fig. 6b**). IL-  
262 32<sup>lo</sup> patients were significantly more likely to cure early after treatment compared to IL-32<sup>hi</sup>  
263 patients (Log rank test, p=0.0025; **Fig. 6c**) with an estimated age- and sex- adjusted Cox  
264 model hazard ratio of 3.5 (95% CI, 1.19 – 10.3, p= 0.023; **Fig. 6d**). Given that our  
265 neighbourhood analysis above indicated a role for IL-32<sup>+</sup> Treg cells in maintenance of the  
266 IDO / PD-L1 niche, we stained tissue sections for IL-32 in combination with a marker of  
267 Tregs (FoxP3; n=22 patients; **Fig. 6e**). Patients stratified based on FoxP3<sup>+</sup> IL-32<sup>+</sup> cell  
268 abundance (**Fig. 6f**) did not show a significant difference in cure rate (**Fig. 6g,h**). In contrast,  
269 when we conducted a similar analysis based on co-expression of IL-32 and CD8 $\alpha$  (n=25  
270 patients; **Fig. 6i-l**) we found that patients with low abundance of CD8<sup>+</sup>IL-32<sup>+</sup> cells were  
271 significantly more likely to cure earlier (Log rank test, p=0.0051) with an age- and sex-adjusted  
272 Cox model hazard ratio of 2.78 (95% CI, 1.093-7.5, p=0.044; **Fig. 6k**). Collectively, these  
273 data strongly argue that IL-32<sup>+</sup> CD8<sup>+</sup> T cells are associated with the generation and / or

274 maintenance of IDO1 and PD-L1 niches during CL and in such a way indirectly serve to  
275 restrain immune-dependent chemotherapy.

276

## 277 **Discussion**

278 Enrichment of cells expressing IDO1 and PD-L1 is a common feature of chronic  
279 inflammatory diseases<sup>66, 67, 68, 69, 70</sup> and cancer<sup>40, 71</sup>, underscoring the role of myeloid-T cell  
280 interactions in pathological tissue microenvironments. High-throughput spatial profiling  
281 studies have revealed immunosuppressive niches in cancer tissue microenvironments  
282 (TMEs), comprising IDO1- and PD-L1- expressing suppressive macrophages, CD8<sup>+</sup> T cells  
283 and regulatory T cells<sup>33, 66, 72</sup>. Two studies also shed light on the regulators of IDO1 and PD-  
284 L1 in the tumour microenvironment. One used multiplexed imaging to show IFN $\gamma$ -dependent  
285 increases in CD4<sup>+</sup>/CD8<sup>+</sup> T cells in *ex vivo* “responder” tumour explants<sup>66</sup>. The second used  
286 limited protein/chemokine panels to characterize dysfunctional CD8<sup>+</sup> T cells in melanoma-  
287 associated tertiary lymphoid structures<sup>73</sup>. In our current study of CL lesions, we applied i)  
288 whole transcriptome-based spatial analysis to identify different cytokines and chemokines  
289 associated with IDO1 and PD-L1 microenvironments, ii) a targeted subcellular 1000-plex  
290 RNA panel to reveal cellular interactions at single cell resolution, and iii) validated our  
291 results using quantitative immunohistochemistry.

292

293 Our study provides new insights into the immunopathology of human CL. First, we  
294 identified myeloid cell-rich niches comprising mature dendritic cells (DC3) and *CCL18*<sup>+</sup> M2-  
295 like macrophages (*CCL18\_mac*) in the papillary dermis that highly express *CD274* (PD-L1)  
296 and *IDO1*. Second, neighbourhood analysis identified close interactions between  
297 *CD274*<sup>+</sup>/*IDO1*<sup>+</sup> myeloid cells, and CD8<sup>+</sup> memory T cells and Tregs as well as with *IDO1*<sup>-</sup>  
298 *CD274*<sup>-</sup> *CCL18*<sup>+</sup> macrophages. Third, we identified a molecular signature associated with

299 these niches (*CCL18*, *IL24*, *IL1B*, *TNFRSF6B*, *IFNGR2*, *CXCL9* and *IL32*) and their cellular  
300 source. Finally, using other geographically and clinically diverse forms of dermal  
301 leishmaniasis, we narrowed this signature to 5 common correlates of *IDO1* and *CD274* (*IL32*,  
302 *LYZ*, *GBP1*, *IFI30* and *FTH1*). While both *GBP1*<sup>74</sup> and *FTH1*<sup>75</sup> have garnered interest as  
303 therapeutic targets in cancer and inflammation, IL-32 emerged as a key factor produced by  
304 CD8<sup>+</sup> T memory and Treg cells in our study. High abundance of IL-32<sup>+</sup>CD8<sup>+</sup> T cells  
305 correlated with slower healing in Sri Lankan patients treated with sodium stibogluconate,  
306 identifying it as a prognostic biomarker for treatment response in this form of leishmaniasis.  
307 Hence, this study provides new insight into mechanisms supporting the generation of  
308 immunosuppressive niches in CL lesions and reveals cell interactions and gene signatures  
309 that may impact treatment response (as shown here) or disease natural history.

310

311 Myeloid cells play a central role in the immunobiology of leishmaniasis and have been  
312 explored extensively in mouse models, with studies ranging from seminal studies of  
313 migratory skin DCs<sup>76</sup> to the more recent identification of embryonic-derived CD206<sup>hi</sup>  
314 macrophages<sup>77</sup> and inflammatory monocytes<sup>78</sup> as preferred host cells for *L. major*. Myeloid  
315 cell heterogeneity in the context of human leishmaniasis is much less well-understood and  
316 our analysis formally demonstrates the complexity of the myeloid cell response in terms of  
317 phenotypic heterogeneity and spatial organisation. We highlight two notable findings. First,  
318 we find a substantial proportion of moDCs and DCs distributed between the lesion core and T  
319 cell rich regions in the hypodermis. These DCs express *IDO1* and *CD274* supporting  
320 previous observations that DCs with regulatory phenotype are expanded in chronic  
321 inflammatory conditions and might contribute to immunosuppression<sup>38, 79</sup>. Second, the lesion  
322 core contains abundant CCL18-expressing macrophages and these account for a significant  
323 fraction of all myeloid cells expressing *IDO1* and *CD274*. CCL18 produced by such

324 macrophages may recruit naïve T cells<sup>80</sup> and Tregs<sup>48</sup> to further augment an inhibitory niche.  
325 In an analogous fashion, CCL18<sup>+</sup> tumour associated macrophages (TAMs) promote  
326 immunosuppression in cancer<sup>81</sup>. Furthermore, IDO1<sup>+</sup> CD274<sup>+</sup> CCL18<sup>+</sup> macrophages express  
327 *IL1B*, *IL24*, and *IFNGR2*. Given previous studies that indicate a role for IFNs in the induction  
328 of PD-L1 and IDO1 in macrophages<sup>39,42</sup> and for TNF in the induction of IL-24 and IL1B<sup>82</sup>  
329 these data are suggestive of macrophage activation by both IFN $\gamma$  and TNF. This conclusion  
330 is further supported by co-expression of *TNF* and *IFNG* in IDO1/ CD274 spots in the lesion  
331 core, associated with T cell infiltration. Thus, in CL the regulation of IC expression appears  
332 distinct from that recently described in the IFN $\gamma$ -depleted core of tuberculosis granulomas<sup>35</sup>.

333

334 In the tumour microenvironment, macrophages also foster a supportive environment for  
335 malignant cell survival through coupled inhibition of apoptosis and compromised  
336 immunosurveillance<sup>83</sup>. For example, soluble decoy receptor 3 (*TNFRSF6B*; DcR3) inhibits  
337 apoptosis by binding to LIGHT<sup>84</sup> or Fas-Fas ligand<sup>85</sup> complexes on T cells and, through its  
338 interaction with heparin sulphate proteoglycans, can also promote epigenetic reprogramming  
339 and macrophage polarisation to an M2 phenotype<sup>86</sup>. We observed that DcR3 was also  
340 expressed in the IDO1 / PD-L1 niches found in CL lesions, suggesting that further  
341 exploration of the role of DcR3 in leishmaniasis is warranted.

342

343 A central finding of this study was the identification of IL-32 as a previously unknown core  
344 component of the IDO1 / PD-L1 niche in multiple forms of dermal leishmaniasis. IL-32 is a  
345 complex and still poorly understood cytokine that can be produced by multiple cell lineages  
346 (reviewed in<sup>87</sup>). Studies of IL-32 are hampered by multiple isoforms, each with distinct  
347 biological effects and the lack of IL-32 in rodents<sup>88</sup>. IL-32 $\gamma$  is the longest isoform with an  
348 intact signal peptide and is secreted. Both IL-32 $\beta$  and IL-32 $\gamma$  are proinflammatory, with the



349 beta isoform being the most abundant and the gamma isoform being the most biologically  
350 active<sup>89</sup>. IL-32 has been mooted as a biomarker in a variety of skin conditions including  
351 atopic dermatitis and melanoma<sup>90</sup>. It has been ascribed a pro-inflammatory and host  
352 protective role in tuberculosis and in models of colitis and arthritis based on the use of  
353 hu*IL32* transgenic mouse models. A role for IL-32 in leishmaniasis has also been previously  
354 suggested, based on similar transgenic mouse models and the enhanced expression of IL-32  
355 in lesion biopsies from patients with *L. braziliensis* infection<sup>61, 88</sup>. However, none of these  
356 published studies has addressed IL-32 expression in a spatially resolved manner. We  
357 confirmed high expression of both IL32 $\gamma$  and IL32 $\beta$  in our patient biopsies, identified the  
358 cellular sources of IL-32 in the lesion, spatially mapped IL-32 and demonstrated that IL-32<sup>+</sup>  
359 CD8<sup>+</sup>T cells represent a key molecular and cellular component of the IDO / PD-L1 niche. In  
360 keeping with other facets of IL-32 biology, our data imply a microenvironmentally-controlled  
361 immunoregulatory role for IL-32 in human CL.

362

363 Despite the differences in pathologies between SL\_CL, *L. braziliensis* CL and PKDL, our  
364 analysis revealed a core gene signature (*IL32*, *LYZ*, *GBP1*, *IFI30* and *FTH1*) associated with  
365 *IDO1*<sup>+</sup> and *CD274*<sup>+</sup> expression. IL-32 expression is commonly associated with T cells and  
366 especially Tregs, though we demonstrate that this cytokine can also be expressed at low  
367 frequency in some myeloid cells in CL lesions. In contrast, *LYZ* (lysozyme), *GBP1*  
368 (Guanylate-Binding Protein 1, an interferon inducible GTPase), *IFI30* (Interferon inducible  
369 lysosomal thiol reductase) and *FTH1* (Ferritin heavy chain 1) are all prototypic myeloid cell  
370 markers. This mixed cellular composition was reflected by deconvolution of cell abundances  
371 in our Visium data sets, wherein we observed a predominance of Treg, CD8<sup>+</sup> T cells,  
372 macrophages and DCs. Further studies are required to determine whether other members of  
373 this core signature contribute to shaping the immunoregulatory environment in leishmaniasis.

374

375 In our previous study of SL\_CL patients, we identified elevated expression of IDO1 and PD-  
376 L1 in pre-treatment biopsies and demonstrated that an early reduction in PD-L1 after  
377 treatment onset was predictive of rate of cure<sup>32</sup>. Although providing a mechanistic basis for  
378 how ICs might restrict the efficacy of T cell-dependent chemotherapy, this study did not  
379 provide insights into the cellular or molecular mechanisms ultimately responsible for driving  
380 IC expression. The results presented here now allow us to propose a model for the regulation  
381 of ICs in CL, rooted in spatial interaction mapping and validated through multiple orthogonal  
382 approaches: 1) CCL18<sup>+</sup> macrophages recruit IL-32<sup>+</sup> CD8<sup>+</sup> T cells and IL-32<sup>+</sup> Tregs into a  
383 myeloid cell niche; 2) IL-32<sup>+</sup> CD8<sup>+</sup> T cells and IL-32<sup>+</sup> Tregs induce expression of ICs in  
384 DCs and macrophages by paracrine signalling through the as-yet-uncharacterised IL-32  
385 receptor, 3) IDO1<sup>+</sup>PD-L1<sup>+</sup> myeloid cells respond to T cell derived cytokines (IFN $\gamma$ , TNF)  
386 and secrete additional M2-polarising cytokines such as IL-24 and IL-1 $\beta$ , and 4) IDO1 and  
387 PD-L1 expressed by DCs and macrophages in the niche promote loss of effector T cell  
388 function, through tryptophan starvation and PD-1 signalling respectively (see Graphical  
389 Abstract).

390

391 The study has some limitations. Clinical sampling was limited on ethical grounds to two  
392 biopsies, so we have been unable to evaluate expression levels of IDO1 or PD-L1 at disease  
393 resolution. Although not statistically significant, patients with low abundance of IL-  
394 32<sup>+</sup>FoxP3<sup>+</sup> Tregs also showed a trend towards faster healing, a result that deserves further  
395 exploration with larger sample sizes. Logistical constraints associated with studying patients  
396 in an endemic country setting impacted our ability to perform phenotypic and / or functional  
397 characterisation of cells isolated from lesion biopsies. Consequently, our cell deconvolution  
398 approaches may not reflect all cell phenotypes present in CL lesions due to the use of non-

399 matched scRNA-seq data sets. As we were unable to isolate lesional mononuclear cells for  
400 in vitro analysis, we cannot formally address the question of T cell antigen specificity or  
401 extend our analysis of myeloid cells ex vivo. Finally, we have limited our current analysis to  
402 exploring cell-extrinsic regulation of IDO1 and PD-L1 expression by myeloid cells. Ongoing  
403 studies are exploring how the regulation of ICs on myeloid cells is regulated in a cell-intrinsic  
404 manner following intracellular parasitism by *Leishmania* (Dey et al, in preparation).

405

406 In summary, using spatially resolved high dimensional analysis of lesion biopsies, we have  
407 mapped the molecular and spatial niches associated with IDO1 and PD-L1 expressing  
408 myeloid cells in CL lesions and identified IL-32-expressing CD8<sup>+</sup>T cells as prognostic of rate  
409 of cure. Given the commonality of niche composition across multiple forms of dermal  
410 leishmaniasis, it is tempting to speculate that our observations may also contribute to local  
411 immunoregulation and treatment response in multiple forms of dermal leishmaniasis and that  
412 similar regulation of the IDO1/ PD-L1 niche may occur during other infectious and non-  
413 infectious diseases.

414

415

## 416 **Methods**

### 417 **Samples: SL2 cohort, BR cohort and IN cohort.**

### 418 **Study design**

419 *Sri Lanka:* The study design for the Sri Lankan cohort was initially published as part of the  
420 validation cohort details in Dey et al, 2021<sup>32</sup>. Briefly, individuals who provided written  
421 informed consent and exhibited clinically highly suspected CL lesions were enrolled. On day  
422 0, punch biopsies were collected and intralesional sodium stibogluconate (SSG) treatment  
423 was administered. Biopsies were processed into formalin-fixed and embedded in paraffin

424 (FFPE) format and then shipped to the University of York (UoY) for subsequent  
425 immunological studies described here. These enrolled patients were then monitored for up to  
426 6 months to assess complete clinical cure, and given weekly intralesional SSG injections. Of  
427 these, 24/25 patients had achieved complete clinical cure by 6 months, and 1/25 patients at  
428 6.5 months. Out of the 25 patients in this cohort, 23/25 patient sections were included in the  
429 neighbourhood image analysis aimed at identifying neighbours of IDO1 and PD-L1 in stained  
430 sections; two were excluded due to insufficient material in the blocks. For including samples  
431 for 10x Visium analysis, these 23 patients were further screened for the presence of parasites  
432 by using an RNA probe against *Amastin* to detect parasites in 5µ thick sections as described  
433 previously<sup>32</sup>. 6/23 were *Amastin*<sup>+</sup> and were included for Visium spatial analysis (P1-P6).  
434 Furthermore, out of the 6 samples included for Visium analysis, only four samples could be  
435 included in the CosMx analysis due to the availability of sufficient material in the blocks for  
436 follow up studies.

437

438 *Brazil*: Patient cohort from Brazil involved 20 patients that agreed to participate by signing  
439 the informed consent Form. Patients were diagnosed on the basis of positive polymerase  
440 chain reaction and/or indirect immunofluorescence and/or ELISA directed to *Leishmania*.  
441 Depending on the size and location of the lesion and the clinical condition of the patients,  
442 treatment was done with systemic pentavalent antimonials (Glucantime) for 20 days; or  
443 intralesional pentavalent antimonials (Glucantime) with one application per week for 4  
444 weeks; or liposomal amphotericin B for 10 days. Biopsy samples of the lesion were collected  
445 on day 0 when the diagnosis was established and patients were followed up after treatment  
446 for 6 months to assess clinical cure. To understand IDO1 and CD274 microenvironments in  
447 healing and non-healing chronic skin *L.(V)b.* lesions, 20 patient samples were screened for  
448 double positivity against diagnostic PCR and ELISA (12/20) and were then stratified on the

449 basis of visual treatment score at 3 months; healed if visual score=0 at 3 months and not  
450 healed if visual score >0 at 3 months. Of 12 samples, only 2 patients had healing score>0 at 3  
451 months and were included in the study. 2 patients with visual score=0 at 3 months with  
452 comparable age, lesion size and lesion duration were then selected from the bigger cohort  
453 (12) to include a total of 4 samples that were processed through 10x Visium.

454

455 *India:* The initial diagnosis was based on clinical features suggestive of PKDL (presence of  
456 papules, nodules and/or hypopigmented macular lesions), a prior history of VL, rK-39  
457 positivity, and/or if they resided in an area endemic for VL. In general, cases with  
458 hypopigmented patches were considered as macular PKDL, whereas cases with an assortment  
459 of papules, nodules, plaques, and/or macules were termed as polymorphic PKDL. Based on  
460 these criteria, individuals who were willing and provided written informed consent were  
461 enrolled for this study. The patients were examined by a clinician, clinical history recorded,  
462 and biological samples (blood and punch biopsy) collected. Subsequently, the diagnosis was  
463 confirmed by qPCR<sup>91</sup>. 2 samples with typical histopathology of PKDL lesions and  
464 comparable RNA quality were chosen. These two patients were enrolled between November  
465 2019 and August 2021. 5u thick sections were cut and processed through 10x Visium.

466 *Lesion characteristics and diagnostic methods.* For patients recruited in Sri Lanka and  
467 included in the study, lesions were dry nodular ulcerative (n=8), dry ulcers (n=6), dry  
468 ulcerated plaques (n=5), wet ulcers (n=2), papular satellite lesions (n=2), nodule with satellite  
469 lesions (n=1), ulcerated plaque with satellite lesions (n=1) with mean ulcerated area of 51.13  
470 mm<sup>2</sup> ( $\pm$  SD, 81.1) and mean area of induration of 1430.2 ( $\pm$  SD, 1966.9). In addition to  
471 clinical assessment, CL was diagnosed by slit skin smears (SSS) (18/23) and PCR (23/23).

472 Amongst Indian patients, the polymorphic case presented with lesions (papules and nodules)  
473 on the face, specifically on the forehead, nose and chin while the macular patient had a hypo

474 pigmented patch on the back. In case of polymorphic cases, the biopsy was collected from a  
475 nodule, whereas in macular PKDL, it was from an area of hypopigmentation. In addition to  
476 clinical examination by a dermatologist, PKDL was also confirmed by qPCR. Both patients  
477 gave a previous history of VL, for which they had received sodium antimony gluconate  
478 For patients recruited in Brazil and included in the study, lesions were showed wet ulcers in  
479 the lower (3/4) or upper limbs (1/4) with mean ulcerated area of 2475mm<sup>2</sup> ( $\pm$  SD, 2148). The  
480 diagnosis was confirmed by PCR specific for *Viannia* subgenus (4/4), indirect  
481 immunofluorescence (2/4) and ELISA (4/4).

482

483 *Slit skin smears (SSS)*: For Sri Lankan cohort only, tissue scrapings from a 3mm superficial  
484 nick from the active edge of the lesions were used to prepare smears on slides, stained with  
485 Giemsa and examined under oil immersion microscopy for the presence of amastigotes.  
486 Parasite density was graded from 0 to 6+ according to WHO guidelines for VL<sup>92</sup>: 0—no  
487 parasites per 1000 high power fields (HPF: x 1000 magnification); 1+: 1–10 parasites per  
488 1000 HPFs; 2+: 1–10 parasites per 100 HPFs; 3+: 1–10 parasites per 10 HPFs; 4+: 1–10  
489 parasites per HPF; 5+: 10–100 parasites per HPF; and 6+: > 100 parasites per HPF.  
490 Amastigote density for each Sri Lankan sample is outlined in Supplementary Table 1.

491

492 *Punch Biopsy*: A 3mm diameter full thickness punch biopsy was taken from the edge or  
493 centre of the lesion under local anaesthesia, transported in formol saline and then fixed in  
494 paraffin blocks and used for H&E or FISH + IF and transcriptome analysis studies.

495 Simultaneously an 2mm diameter punch biopsy was taken for PCR.

496

497 *PCR*: DNA extraction was performed from 2mm excision biopsy and was used as an input  
498 material for diagnostic PCR for *Leishmania* positivity as previously described<sup>32</sup>. In Sri

499 Lanka, LITSR/L5.8S specific primers were used that amplifies a 320 bp fragment of ITS1  
 500 region of *Leishmania* genus-specific DNA. In Brazil, kDNA specific primers were used that  
 501 amplify 750 bp kinetoplastid DNA of *Leishmania* subgenus *Viannia*<sup>93</sup>. In India, DNA  
 502 extraction was performed using manufacturer’s instructions using QIAamp DNA mini kit,  
 503 Qiagen, Hilden, Germany from a skin biopsy collected in phosphate- buffered saline (20 mM,  
 504 pH 7.4) and eluted in 50 µL of DNA elution buffer. Real-time PCR was performed using  
 505 specific primers for kinetoplast minicircle gene, using 1ul of DNA as input material and 400  
 506 nM of each primer. DNA isolated from a *Leishmania donovani* strain MHOM/IN/1983/AG83  
 507 served as the positive control while negative controls used were DNA from a healthy donor  
 508 (no amplification), and a reaction mixture with water instead of template DNA (no-template  
 509 control)<sup>91</sup>.  
 510

|                                               |                                            |                                                 |
|-----------------------------------------------|--------------------------------------------|-------------------------------------------------|
| Diagnostic PCR primers for <i>L. don</i> CL   | LITSR (forward) 5’-<br>CTGGATCATTTCGGATG-3 | L 5.8S (reverse) 5’-<br>TGATACCACTTATCGCACTT-3’ |
| Diagnostic PCR primers for <i>L. (V)</i> kDNA | B1.<br>5’-GGGGTTGGTGTAATATAGTG<br>G-3’     | B2.<br>5’-CTAATTGTGCACGGGGAGG-<br>3’            |
| Diagnostic PCR                                | Forward: 5’-<br>CTTTTCTGGTCCCTCCGGGTAGG-   | reverse: 5’-<br>CCACCCGGCCCTATTTTACACC          |

|                                                 |    |       |
|-------------------------------------------------|----|-------|
| primers<br>for <i>L.</i><br><i>don.</i><br>PKDL | 3' | AA-3' |
|-------------------------------------------------|----|-------|

511

512 *ELISA and Indirect immunofluorescence reaction:* In Brazil, all sera were tested for  
513 immunoglobulin G (IgG) antibodies at 1:50 dilution in the ELISA using whole *L. major*-like  
514 parasite lysate (ELISA–*L. major*-like) as previously described<sup>94</sup>. For both antigens, the cut-  
515 off point was determined using a receiver operating characteristic (ROC) curve. The  
516 reactivity index (RI) was calculated for each sample by dividing the sample absorbance value  
517 by the cut-off. Samples were considered positive if the RI value was  $\geq 1$ . The  
518 spectrophotometric reading of each well was performed at 450 nm using a Multiskan GO  
519 instrument (Thermo Scientific, Finland). The IIF test was performed on the slides, containing  
520 the suspension of fixed promastigotes of *Leishmania* (*Leishmania major*-like  
521 promastigotes/MHOM/BR/71/49) as previously described<sup>95</sup>. Then the slide was observed in  
522 the fluorescence microscope, with the objective of 250  $\times$ .

523

## 524 **Sectioning**

525 FFPE blocks were placed on cool plate prior to sectioning and 5 $\mu$ m sections were cut and  
526 serial sections were placed onto Superfrost glass slides for CosMx or H&E or 10x Visium  
527 onto the capture area making sure that all layers of the skin were represented in the cut  
528 section.

529

## 530 **Low-resolution spatial transcriptomic mapping of CL lesions using 10x Visium**



531 Visium gene expression slides were processed using the Visium Spatial gene expression  
532 reagent kits for FFPE as per recommended protocols. In brief, slides were deparaffinised in  
533 Xylene twice for 10 minutes each and then stained for hematoxylin and eosin. Stained slides  
534 were coverslipped and imaged on an Axioscan slide scanner. Post imaging cover slips were  
535 removed, slides were placed in a Visium cassette and were de-crosslinked. Human probes  
536 were added overnight after which they were extended and released. Library preparation was  
537 done based on manufacturer's instructions and sequenced using a NovaSeq 6000. Raw  
538 FASTQ files were aligned to the GRCh38 genome  
539 ([https://www.ncbi.nlm.nih.gov/datasets/genome/GCF\\_000001405.40/](https://www.ncbi.nlm.nih.gov/datasets/genome/GCF_000001405.40/)) and the  
540 Spaceranger\_1.3.0 (10x) count was used to generate UMI counts per spatial barcode. Raw  
541 counts were normalised and analysed further. Code used for analysis and figures is described  
542 under "Code Availability".

543

#### 544 **Integration and clustering of 10x Visium data**

545 We used Seurat (Seurat\_4.3.0) package in R 4.2.3 to analyse spot matrices. Normalisation  
546 across spots was performed using SCTransform(). We used FindIntegrationAnchors()  
547 function to find anchor spots across samples and then used IntegrateData() to integrate all  
548 samples based on 3000 features as identified upon data integration. 30 Principal Components  
549 derived using 3000 features in the integrated assay were used as an input for clustering  
550 Visium spots with a resolution of 0.5 using FindClusters() and UMAP was used to visualise  
551 clustering in two-dimensional space. Differential gene expression (DE) between clusters was  
552 calculated first by running PrepSCTFindMarkers() to normalise for median genes as a proxy  
553 for sequencing depth. FindAllMarkers() was then used to find DE genes using a minimum  
554 setting for log2fold change as 0.25 with genes that were expressed in a minimum of 25%  
555 spots (min.pct=0.25). P-value of DE genes was based on a two-tailed Wilcoxon Rank Sum

556 test. List of DE markers from each cluster was then fed into CellMesh<sup>96</sup> (  
557 [https://uncurl.cs.washington.edu/db\\_query](https://uncurl.cs.washington.edu/db_query)) using probabilistic model to identify probable cell  
558 types expressed in cluster spots. Clusters were then annotated based on most abundant cell  
559 type expressed and then plotted onto each tissue image using SpatialDimPlot function from  
560 Seurat and required DE genes were visualised using EnhancedVolcano package in R. Spatial  
561 maps of *IDO1* and *CD274* (PD-L1) were generated using SpatialPlot() function. For  
562 comparison across My1, My2 and My3, matrices were extracted from Seurat and plotted in  
563 Graphpad for violin plots.

564

#### 565 **Deconvolution of Visium spots to identify immune cell abundance**

566 We utilized Cell2location<sup>52</sup> to deconvolve cell type composition per 55µm Visium spatial  
567 spots. The hyperparameters used were N\_cells\_per\_location=30 and detection\_alpha=20,  
568 using the dataset Reynolds *et al*<sup>38</sup> (accession number: E-MTAB-8142;  
569 [www.ebi.ac.uk/arrayexpress/experiments/E-MTAB-8142](http://www.ebi.ac.uk/arrayexpress/experiments/E-MTAB-8142).) as a skin single-cell reference  
570 dataset. First, we estimated reference cell type signatures by training a negative binomial  
571 regression model for 1,000 epochs retaining the cell-type annotations from Reynolds *et al*.  
572 We then used the reference signature model to deconvolute the spatial data using the  
573 aforementioned hyperparameters, training the Cell2location model for 30,000 epochs. We  
574 inferred cell abundance per spatial spot using the 5% quantile values of the posterior  
575 distribution, where the model has high confidence as per the tool's manual. Predicted  
576 abundances were used to infer compositions in My1, My2, My3, *IDO1*, *CD274* and *IDO1*/  
577 *CD274* spots.

578

#### 579 **Identifying molecular networks associated with CD274 and IDO1 expression**

580 To look for correlation between *IDO1* and *CD274* across all spots, all spots covered under the  
581 tissue from Sri Lankan patients (n=6) were visualised using FeatureScatter() function in  
582 Seurat. Thresholds on the scatterplot were put below or equal to median of total expression of  
583 *IDO1* (1.2) and *CD274* (0.6). All spots were then annotated as *IDO1* spots ( $IDO1 > 1.1$  &  
584  $CD274 < 0.5$ ) or *CD274* spots ( $IDO1 < 1.1$  &  $CD274 > 0.5$ ) or *IDO1/ CD274* spots ( $IDO1 >$   
585  $1.1$  &  $CD274 > 0.5$ ) or rest of the spots ( $IDO1 < 1.1$  &  $CD274 < 0.5$ ). DE genes were then  
586 graphed as line plot in GraphPad 9.3.1 whereas the rest were plotted as dot plots using  
587 DotPlot function in Seurat in R. A similar strategy was followed for patients from Brazil  
588 (n=4) presenting with CL lesions and patients from India (n=2) presenting with PKDL  
589 lesions.

590

591 We performed a pairwise correlation analysis of all genes in the dataset with *IDO1* and  
592 *CD274* using the cor.test() function from the R stats package (version 4.1.1), employing  
593 Spearman's ranked correlation method. A significance threshold of 0.05 was applied to  
594 identify significant correlations. Subsequently, the top 50 correlated genes from each dataset,  
595 which included Visium gene expression data from 6 Sri Lankan CL patients, 4 CL patients  
596 from Brazil, and 2 PKDL patients from India, were extracted. These gene sets were then  
597 subjected to comparison using Venny 2.0  
598 (<https://bioinfogp.cnb.csic.es/tools/venny/index2.0.2.html>) to identify common correlates of  
599 *IDO1* and *CD274* across these three datasets.

600

601 **Single cell resolution spatial transcriptomic mapping of CL lesions using CosMx**  
602 **molecular imager.**

603 For CosMx, a single slide containing sections from skin lesions of 4 patients from SL2  
604 patients were sent to Nanostring Translational Services lab, Seattle under Technology Access

605 Program (TAP). CosMx Human Universal Cell Characterization RNA Panel (1000-plex) was  
606 used to analyse gene expression at subcellular level. Morphology of the tissue was visualised  
607 by staining for B2M/CD298, PanCK, OPB (for parasite), CD3 antibodies and DAPI post  
608 hybridization of probes. The methods for sample processing and cell segmentation are  
609 described in CosMx methods study<sup>53</sup>. A total of 20 Fields of View (FOVs) were created  
610 across 4 patient samples. Expression matrix of transcripts along with their x, y and z  
611 coordinates, cell ID, metadata, FOV positions were loaded onto Giotto package to create an  
612 integrated giotto object in R<sup>56</sup> and then filtered based on minimum expression threshold of  
613 1;> 5 features/cell and > 5 cells expressing one feature. Expression matrix was normalised  
614 using standard method of data normalisation for total library size followed by scaling for a  
615 factor of 6000, log normalisation and z scoring of data by genes and/or cells. Expression  
616 values were then regressed for total sum of feature expression and number of features  
617 expressed per cell to account for batch to batch variation.

618

### 619 **Clustering and cell type annotation of CosMx data**

620 UMAP dimension reduction algorithm was used for individual cell data presentation based on  
621 CosMx SMI gene expression profiles. For a further QC, total count numbers and slide ID  
622 were projected onto UMAP space to assess data quality and no total count-based clustering  
623 bias was found. Coarse cell typing was done using nb\_clust, a semi-supervised cell clustering  
624 (negative binomial) algorithm developed by NanoString team resulting in detection of 16  
625 immune cell types using single cell data sets. 6 unsupervised cell clusters (KC1, KC2, KC3,  
626 plasmablast2, fib2 and mac2) were also identified and were labelled on the most enriched cell  
627 type based on CellMesh reference database<sup>96</sup>. DE between clusters was done using  
628 findMarkers\_one\_vs\_all from Giotto package using Gini coefficient Followed by  
629 plotMetaDataHeatmap from Giotto package to plot heatmap of gene expression. Cell ID and

630 expression matrix of all cells were then imported into Seurat package and subclustered to  
631 identify further subtypes. Myeloid cells (cluster IDs: mac, mac2, mDC, neutrophil, pDC,  
632 monocyte, mast) were subclustered into 13 subtypes that were annotated on gene expression  
633 and projected onto UMAP space. 12% of total cells that showed abundance of border  
634 transcripts from nearby cells due to faulty assignment of transcripts were subsetted out.  
635 ImageDimplot from Seurat and SpatPlot from Giotto were used to map cell types onto space.

636

### 637 **Neighbourhood analysis of *CD274* and *IDO1* expressing cells**

638 *IDO1* and *CD274* values from all myeloid cells were correlated and thresholds were placed  
639 that showed clear assignment of all myeloid cells into *IDO1*mye<sup>+</sup> (*IDO1* > 3 and *CD274* <3),  
640 *CD274*mye<sup>+</sup> (*IDO1* < 3 and *CD274* >3), *IDO1*<sup>+</sup>/*CD274*mye<sup>+</sup> (*IDO1* > 3 and *CD274* >3) and  
641 were annotated as such. SpatPlot2D from Giotto package was used to map cell types onto  
642 space. To create a network that revealed spatial relationships and interactions among  
643 individual cells, we first used plotStatDelaunayNetwork function from Giotto to estimate  
644 distance between each cell and its neighbours by calculating pairwise distances between cells  
645 and identifying statistically significant connections. We estimated that each cell had 4-6  
646 nearest neighbours. We then used createSpatialNetwork from Giotto using k =4 to limit the  
647 number of neighbours to 4.

648

649 To investigate cellular interactions within the spatial network, we first created an interaction  
650 map for *IDO1*mye<sup>+</sup>, *CD274*mye<sup>+</sup>, *IDO1*<sup>+</sup>/*CD274*mye<sup>+</sup> with 4 immediate neighbour cells  
651 using annotateSpatialNetwork function from Giotto. To create spatial plots illustrating these  
652 interactions, we first used findNetworkNeighbors function to identify these neighbours.  
653 Spatial plots were then generated using SpatPlot2D function to visualize the cellular  
654 interactions. Cells were color-coded based on their classification as “source” (specified cell;

655 IDO1mye<sup>+</sup> or CD274mye<sup>+</sup> or IDO1<sup>+</sup>/CD274mye<sup>+</sup>) or "neighbour" (amongst 4-6 immediate  
656 neighbours of specified cell) or "both" (a neighbour and a source cell) or "others" (not a  
657 neighbour to specified cell nor a source cell). Cell IDs and cell type annotation of these cells  
658 were then imported into UpsetR shiny app <sup>57</sup> (<https://gehlenborglab.shinyapps.io/upsetr/>) to  
659 estimate the most abundant neighbour combination to IDO1mye<sup>+</sup> or CD274mye<sup>+</sup> or  
660 IDO1<sup>+</sup>/CD274mye<sup>+</sup> cells and into a worksheet to estimate composition of these populations  
661 and graphed in GraphPad. For additional validation, neighbour combinations were also  
662 checked in an excel sheet to tally neighbour combination numbers. To look at spatial maps of  
663 specific interactions, an additional metadata column with information about interacting and  
664 non-interacting cell types of the selected cell-cell interaction was created and visualised using  
665 spatPlot from Giotto.

666

667 To look at cytokine and chemokine expression patterns in source and neighbouring cells, cell  
668 IDs of IDO1mye<sup>+</sup> or CD274mye<sup>+</sup> or IDO1<sup>+</sup>/CD274mye<sup>+</sup> source cells and top 5 neighbours  
669 (CCL18\_mac, Treg, IDO1mye<sup>+</sup>, CD274mye<sup>+</sup>, T CD8 memory) were subsetted and violin  
670 plots, heatmaps (using Giotto in R) or bar charts (in GraphPad Prism 10) were plotted to look  
671 at cytokine expression in these cells.

672

### 673 **Immunostaining**

674 FFPE sections were obtained from 23 or 25 Sri Lankan patients, with 23 FFPE patient lesion  
675 blocks used for the IDO1, PD-L1, and CD8 staining set due to material constraints. For  
676 FoxP3 staining set, only 22 sections were analysed due to sample detachment during  
677 processing. The staining protocol involved following steps: heat fixation at 60°C to ensure  
678 sample adherence, followed by two rounds of 5-minute deparaffinization in histo clear/xylene  
679 at room temperature (RT). Subsequent steps included equilibration in 95% ethanol for 3

680 minutes, 70% ethanol for another 3 minutes, and hydration in distilled water for 3 minutes.  
681 Antigen retrieval was achieved through a 15-minute high-pressure treatment with citrate  
682 buffer (pH 6.0), followed by a 25-minute standing period at RT. After two 5-minute washes  
683 with wash buffer (PBS + 0.5% BSA w/v), tissue sections were delineated with a wax pen.  
684 The procedure continued with blocking (PBS + 0.1% Triton X-100 v/v + 5% Normal donkey  
685 serum v/v + 5% Normal goat serum v/v + 1% BSA w/v) for 30 minutes, overnight primary  
686 antibody incubation with IDO1 (1:200) and PD-L1 (1:500) at 4°C in the fridge, and three 5-  
687 minute washes the next day. Secondary antibody staining for 30-45 minutes at RT employed  
688 CF750 Donkey Anti-Rabbit IgG CF<sup>TM</sup> 750 and Goat anti-Mouse Dy650 at a 1:500  
689 concentration. Sections were then incubated with CD8-AF594 for 2h at room temperature.  
690 After three more buffer washes, YOYO-1 at 0.2uM concentration was added for 30 minutes  
691 in wash buffer. Three final wash buffer washes were performed before applying Prolong  
692 Gold mounting media and coverslips.

693

694 For the IL-32 CD8 set and IL-32 FoxP3, the same protocol was followed with minor  
695 adjustments. Antigen retrieval utilized TE buffer (10mM Tris Base, 1mM EDTA, 0.05%  
696 Tween 20, pH 9.0), while pre-primary blocking consisted of PBS + 0.1% Triton X-100 v/v +  
697 5% Normal goat serum v/v + 1% BSA w/v. The slides were incubated with IL-32 (1:400) and  
698 CD8a or FoxP3 overnight at 4°C and were developed with goat anti-rabbit Dylight 650 and  
699 Goat anti-mouse AF555 F(ab)<sub>2</sub> at a 1:500 concentration, respectively. Notably, no second  
700 blocking step was carried out for IL-32 CD8/ FoxP3 set. Detailed antibody information,  
701 including catalogue numbers and dilutions, can be found in the reporting summary.

702

703 **Image acquisition and analysis.**

704 Whole tissue section images were acquired using Zeiss AxioScan.Z1 slide scanner at 20x  
705 magnification. Identical exposure times and threshold settings were used for each channel on  
706 all sections of similar experiments. Whole section images of IDO1, PD-L1, CD8/ FoxP3 and  
707 IL-32 were quantitated using StrataQuest Analysis Software (TissueGnostics, v  
708 7.0.1.178). We first segmented nuclei based on YOYO1 staining and then created cell  
709 polygons over grey images of CD8 (outside), PD-L1(outside and inside) and IDO1 (outside  
710 and inside) using nuclei mask. A cut off was applied on IDO1/PDL-1 mean intensity based  
711 on visual inspection of the tissue to delineate IDO1/ PD-L1 <sup>+/+</sup> cells. We then created coded  
712 images for each of the markers and used proximity maps function in Strataquest 7.178  
713 (<https://tissuegnostics.com/products/contextual-image-analysis/strataquest>) to generate  
714 distance maps at 25, 50 and 100 µm from IDO1, PD-L1 or IDO1 PD-L1 double positive  
715 polygons and then detected CD8 masks within these proximity areas

716

717 For quantification of IL-32 and CD8/ FoxP3, nuclear segmentation was based on YOYO1  
718 and expanded outside of nuclei for 10 µm for IL-32 and outside for 1µm for CD8 (also a ring  
719 mask with interior and exterior radius of -0.20 and +0.20 µm). As FoxP3 staining was  
720 nuclear, cell polygons were created on FoxP3 staining without any expansion on nuclei mask.  
721 Cut-offs were also applied to nuclei, IL-32 and CD8/ FoxP3 mean intensity detection to  
722 ensure no false positives were included. The same cut-off was applied for all samples.  
723 Scattergram was generated with IL-32 and CD8/ FoxP3 mean intensities and gated on  
724 positive IL-32 and CD8/ FoxP3 cells. Upper right quadrant of these scattergrams gave data  
725 for IL-32<sup>+</sup> CD8<sup>+</sup>/ IL-32<sup>+</sup> FoxP3<sup>+</sup> cells.

726

727 **Multivariate Cox proportional hazard model**



728 For correlation of IL-32 with cure rates, total IL-32<sup>+</sup> CD8<sup>+</sup> IL-32<sup>+</sup> and FoxP3<sup>+</sup> IL-32<sup>+</sup> cells  
729 per mm<sup>2</sup> of tissue section per patient (n=22-25) was computed from image analysis. Patients  
730 were then stratified on geomean of total IL-32 (6969.37), CD8<sup>+</sup> IL-32<sup>+</sup> (2800.9), FoxP3<sup>+</sup> IL-  
731 32<sup>+</sup> (544.0) expression into IL-32 high (>6969.37; n=14) or low (<6969.37; n=11) and  
732 CD8<sup>+</sup>IL-32<sup>+</sup> high (>2800.9; n=13) or low (<2800.9; n=12) and FoxP3<sup>+</sup>IL-32<sup>+</sup> high (>544.0;  
733 n=16) or low (<544; n=6). These values were then imported in R and Kaplan Meier survival  
734 (cure) curves were generated for IL-32 or CD8<sup>+</sup>IL-32<sup>+</sup> or FoxP3<sup>+</sup> IL-32<sup>+</sup> expression groups  
735 using the survfit function, and survival differences were assessed with the survdiff function  
736 from survminer, survival, ggplot2 packages. We then constructed multivariate hazard models  
737 adjusted for participant age and sex, employing the survival and survminer packages. The  
738 statistical scores were derived from Wald's statistic value, followed by estimation of hazard  
739 ratios, which were visualized on forest plots.

740

#### 741 **RNA isolation and qPCR**

742 The total RNA was extracted from formalin-fixed paraffin-embedded (FFPE) patient samples  
743 using RNeasy FFPE Kit (Qiagen) as per manufacturer's protocol. Briefly, 2 x 10µm sections  
744 were cut from each block and put into deparaffinization buffer (Qiagen). Sample lysis was  
745 done using Proteinase K digestion for 15 minutes. After lysis, samples were incubated at  
746 80°C for 15 minutes followed by 15 minutes of DNase treatment. Finally, concentrated RNA  
747 was purified using RNeasy MinElute spin columns, and eluted in a volume of 14–30 µl.  
748 Purity and concentration of extracted RNAs were checked and quantified by reading at 260  
749 and 280 nm in a NanoDrop spectrophotometer (Thermo Fisher). Next, 50ng total RNA was  
750 reverse transcribed using Superscript IV first strand cDNA Synthesis Kit (Invitrogen) and  
751 random hexamers (Invitrogen) according to manufacturer's protocol.

752 qRT-PCR was performed with Fast SYBR Green Master Mix (ThermoFisher) and primers  
753 using a StepOnePlus Real-Time PCR System (ThermoFisher). cDNA extracted from LPS  
754 (100 ng/ul for 4 hours) stimulated PMA (100 ng/ul) differentiated THP-1 cells line was used  
755 as a positive control to optimise primers<sup>97</sup>. All primers were optimised by serially diluting  
756 LPS stimulated THP-1 cDNA. Relative transcript levels were determined using the  $\Delta\Delta C_t$   
757 method using GAPDH/ ACTB as a housekeeping gene and healthy skin. All reactions were  
758 performed in duplicates. Primer list used in the study is given in the table below.  
759  
760

|                  |                                       |
|------------------|---------------------------------------|
| <i>IL32alpha</i> | Forward 5'-GCTGGAGGACGACTTCAAAGA-3'   |
| <i>IL32alpha</i> | Reverse 5'-GGGCTCCGTAGGACTTGTC-3'     |
| <i>IL32beta</i>  | Forward 5'-GAAGACTGCGTGCAGAAGGT-3'    |
| <i>IL32beta</i>  | Reverse 5'-CTTTCTATGGCCTGGTGCAT-3'    |
| <i>IL32gamma</i> | Forward 5'-AGGCCCGAATGGTAATGCT-3'     |
| <i>IL32gamma</i> | Reverse 5'-CCACAGTGTCTCAGTGTGTCACA-3' |
| <i>IL32delta</i> | Forward 5'-TCTGTCTCTCTCGGGTCCTCTCT-3' |
| <i>IL32delta</i> | Reverse 5'-TGTCTCCAGGTAGCCCTCTTTG-3'  |

761

762

### 763 **Acknowledgements**

764 The authors thank all patients and their families who took part in this study. We also thank all  
765 members of the Kaye laboratory at Hull York Medical School, University of York for their

766 useful comments and suggestions on this project, Robert Nica and Simina Laslau at the  
767 technical department at Tissue Gnostics for help with Strataquest, TAP team at Nanostring,  
768 Seattle specially Emily Killingbeck, Youngmi Kim and Claire Williams for initial support  
769 with CosMx and the Biosciences Technology Facility at University of York for support  
770 throughout the project. Biorender.com was used to generate the graphical abstract.

771

## 772 **Author contributions**

773 N.S.D., S.D. and P.M.K. conceived the study; N.S.D. and S.D. did the analysis; N.S.D., S.D.,  
774 and N.B. conducted experiments; N.S.D and P.M.K wrote the manuscript; P.M.K, S.R.,  
775 M.C., and H.G. secured funding; all other co-authors provided materials or clinical  
776 assessments for the study and reviewed the manuscript.

777

## 778 **Data availability**

779 The sequencing data reported in this paper have been deposited in the GEO database under  
780 the accession code GEO: TBC. The processed sequencing data is available as Rds files on  
781 Zenodo: <https://doi.org/10.5281/zenodo.10402126>. Additional data (**Supplementary Table**  
782 **4**) related to the figures is also available on figshare (DOI:  
783 <https://doi.org/10.6084/m9.figshare.24803511>).

784

## 785 **Code availability**

786 Code used for analysis (including that for generating Figs from Visium seq data and CosMx  
787 imaging data) in this study is available at <https://github.com/NidhiSDey/leish-ME>

788

## 789 **Ethics statements**

790 **Institutional review board statement**

791 Written informed consent including for lesion photographs was obtained from participants  
792 under a protocol for the project titled “Towards a global research network for the molecular  
793 pathological stratification of leishmaniasis” approved by Ethical Review Committee of the  
794 Faculty of Medical Sciences, University of Jayewardenepura (ref: 780/13 & 52/17), Ethics  
795 Committee of the Faculdade de Medicina, Universidade de Sao Paulo- CAAE  
796 39964520.8.0000.0068, Institutional Ethics Committee of School of Tropical Medicine,  
797 Kolkata and Institute of Post Graduate Medical Education and Research, Kolkata  
798 (IPGME&R/IEC/2019/208) and the Biology Ethics Committee (ref: PK201805), Department  
799 of Biology, University of York. This study was conducted according to the Declaration of  
800 Helsinki (2013).

801

802 **Inclusion and Ethics statement**

803 We affirm that our research upholds the highest ethical standards and contributes to the  
804 advancement of immunological science in an inclusive and responsible manner.

805

806 **Funding**

807 This work was supported by funding from the UK Medical Research Council / UK Aid  
808 Global Challenges Research Fund (MR/P024661/1 to PMK, SR, HG, and MC), a Wellcome  
809 Trust Senior Investigator Award (WT104726 and WT224290 to PMK) and Fundac o de  
810 Amparo   Pesquisa do Estado de S o Paulo (2018/14398-0) and fellowship (2019/25393-1)  
811 to HG.

812

813 **Competing interests**

814 All authors declare no competing interests.

815 **Figures and Extended Figures**

Fig.1: 10x Visium guided spatial transcriptomics reveals organised domains in CL lesions from Sri Lanka

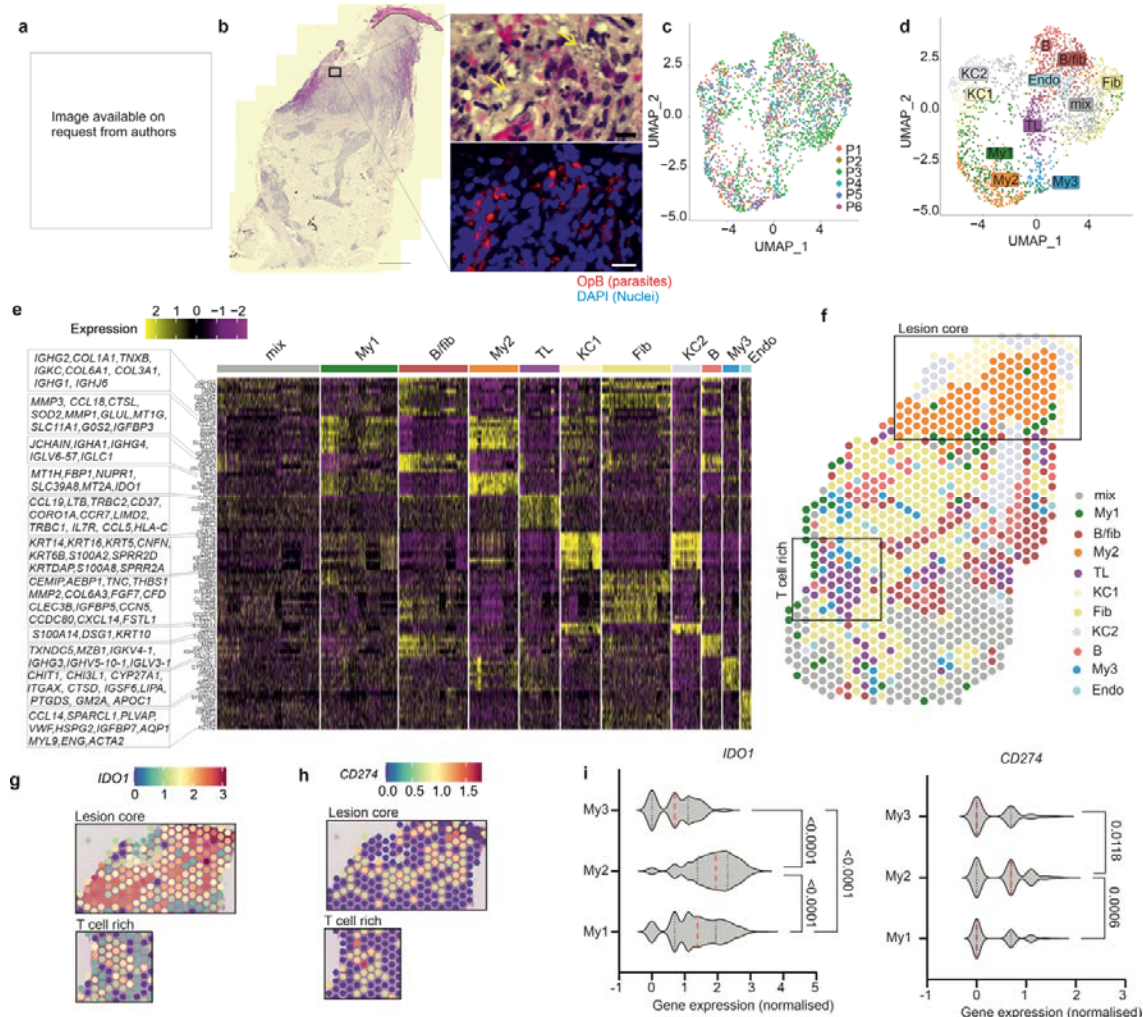

816

817 **Fig. 1: Spatial transcriptomics identifies spatial domains in *L. donovani* CL lesions.**

818 **a**, Patient P3 showing lesion macroscopic features. **b**, Left, histology of P3 shows dense  
 819 dermal infiltrate (Hematoxylin and eosin; H&E; Bar 500µm). Right, Higher magnification of  
 820 site of parasitism; top, H&E and bottom, anti-*Leishmania* OPB staining. Bar 10 µm. Parasites  
 821 indicated in H&E by yellow arrow. **c**, UMAP projection of Visium spots from patients P1-P6  
 822 coloured by patient ID. **d**, as (**c**) but clustered, coloured and labelled by gene expression. **e**,  
 823 Heatmap showing the top 10 genes enriched in each cluster. **f**, Spatial map for patient P3  
 824 coloured by clusters identified in (**d**). **g-h**, Spatial feature plots for P3 showing normalised  
 825 values of *CD274* (**g**) and *IDO1* (**h**) **i**, *IDO1* and *CD274* violin plots for My1-3 clusters for P1-  
 826 6 (red dotted line, mean; black dotted lines, IC range) p-values for group mean ranks  
 827 compared by Kruskal-Wallis one-way test.

828

Extended Data Fig. 1: Patient photographs, histological staining of sections and spatial maps of spot clusters from Sri Lanka

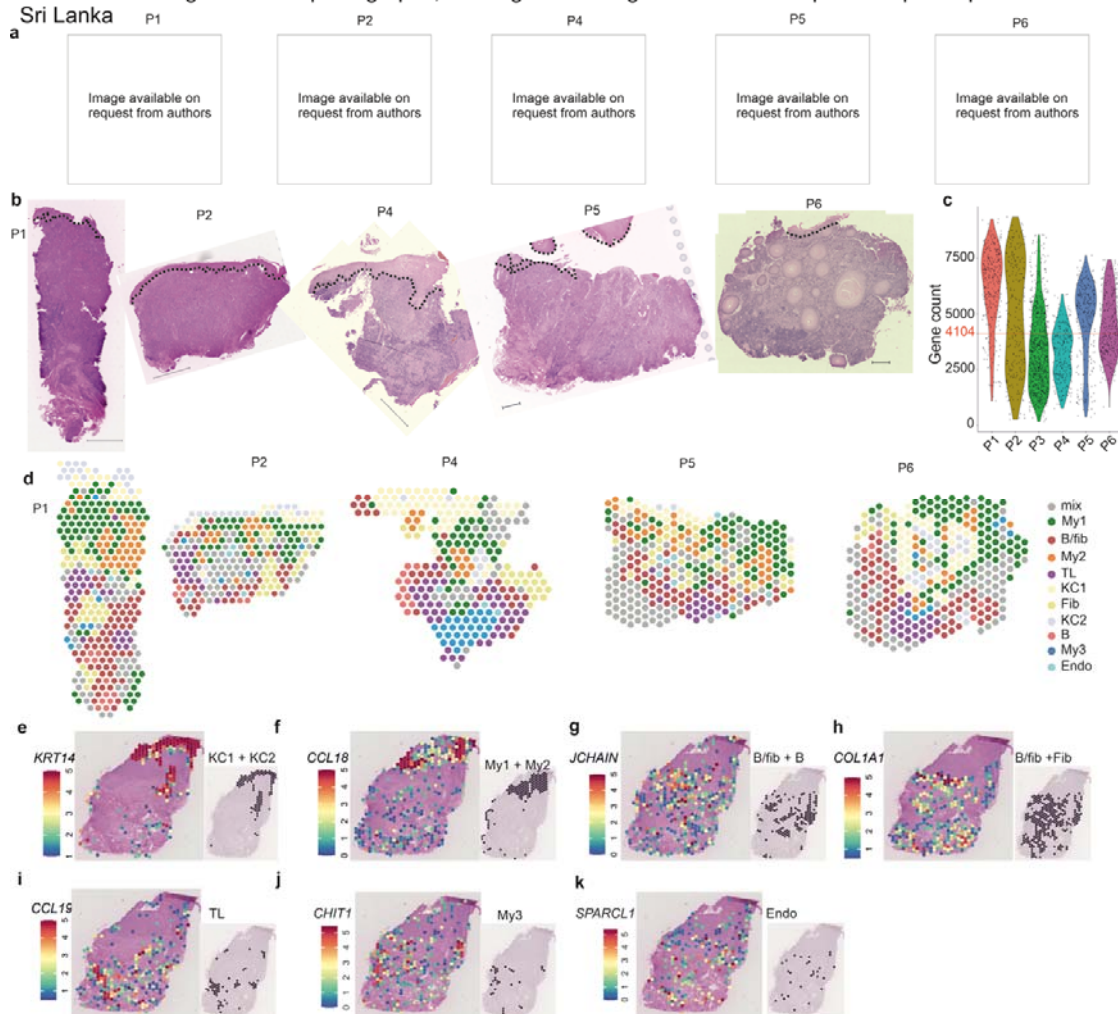

829

830 **Extended Data Fig 1: Spatial transcriptomics identifies spatial domains in *Leishmania***  
 831 ***donovani* infected CL skin.**

832 **a**, Photographs of patients P1, P2, P4, P5 and P6. **b**, H&E images of patients described in **(a)**  
 833 showing dense cellular infiltrate. **c**, Violin plot showing overall gene counts across all  
 834 patients. Red line shows median gene count across all samples (n=6) **d**, Spatial maps for  
 835 patients described in **(a)** coloured by clusters identified in Fig.1f. **e-k**, Spatial feature plot for  
 836 P3 overlaid on H&E showing normalised gene expression of top genes expressed in each  
 837 cluster: *KRT14*, *CCL18*, *JCHAIN*, *COL1A1*, *CCL19*, *CHIT1* and *SPARCL1* (left panels)  
 838 and spatial maps of respective clusters (right panels).

839

Extended Data Fig. 2 :Decomposition of cell types in 10x Visium spots

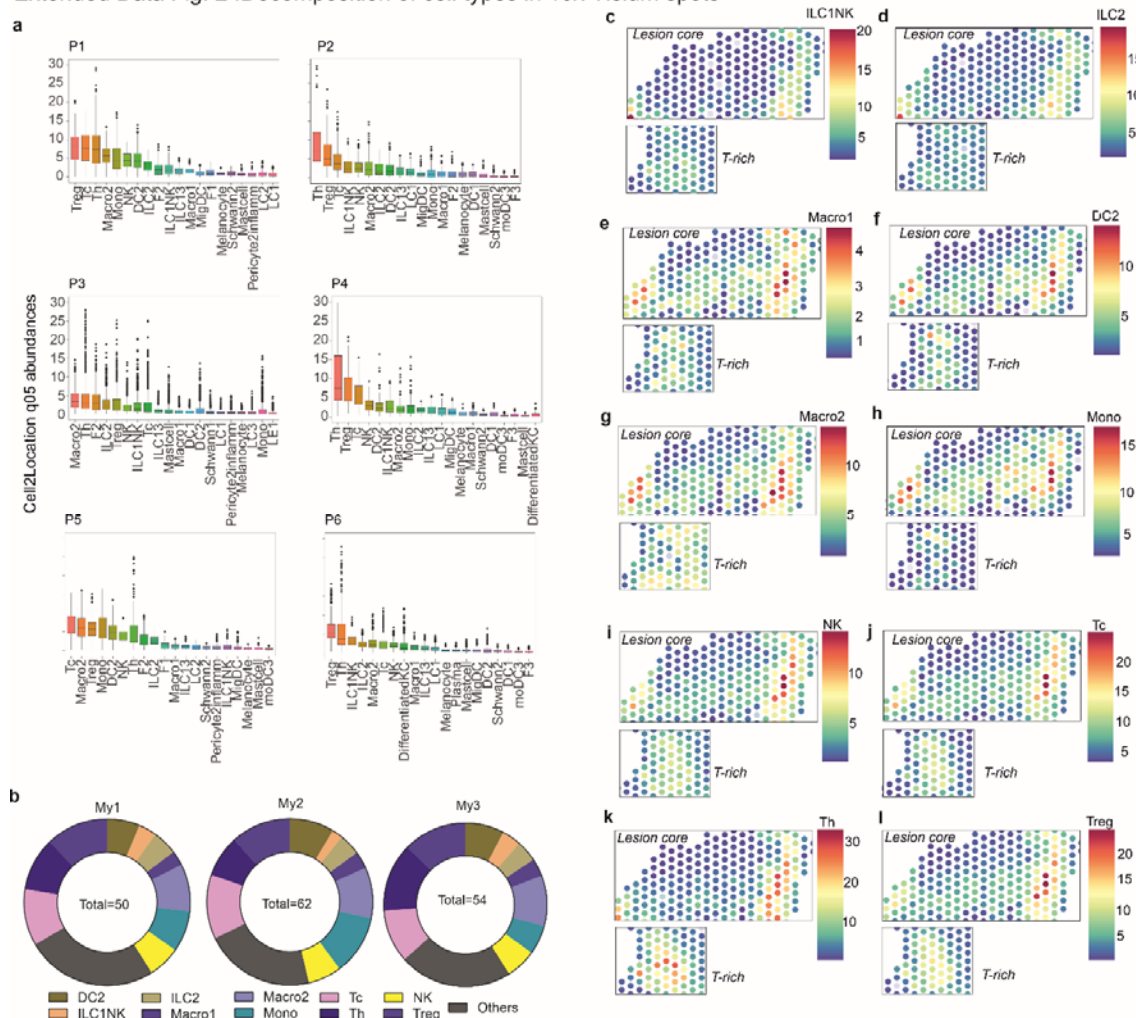

840

841 **Extended Data Fig. 2: Deconvolution of cell types in 10x Visium spots**

842 **a**, Bar plot showing 5<sup>th</sup> quantile predicted cell abundances per spot for P1-P6. Black line  
 843 represents median value, bar indicates interquartile range. **b**, Donut representation of  
 844 predicted average abundance for the 10 most abundant cell types in My1-3 spots. Total  
 845 (inside each donut) depicts average number of cells predicted across My1-3 spots. **c-l**,  
 846 Predicted abundance of cell types in lesion core and T-rich regions (shown for patient P3).

847





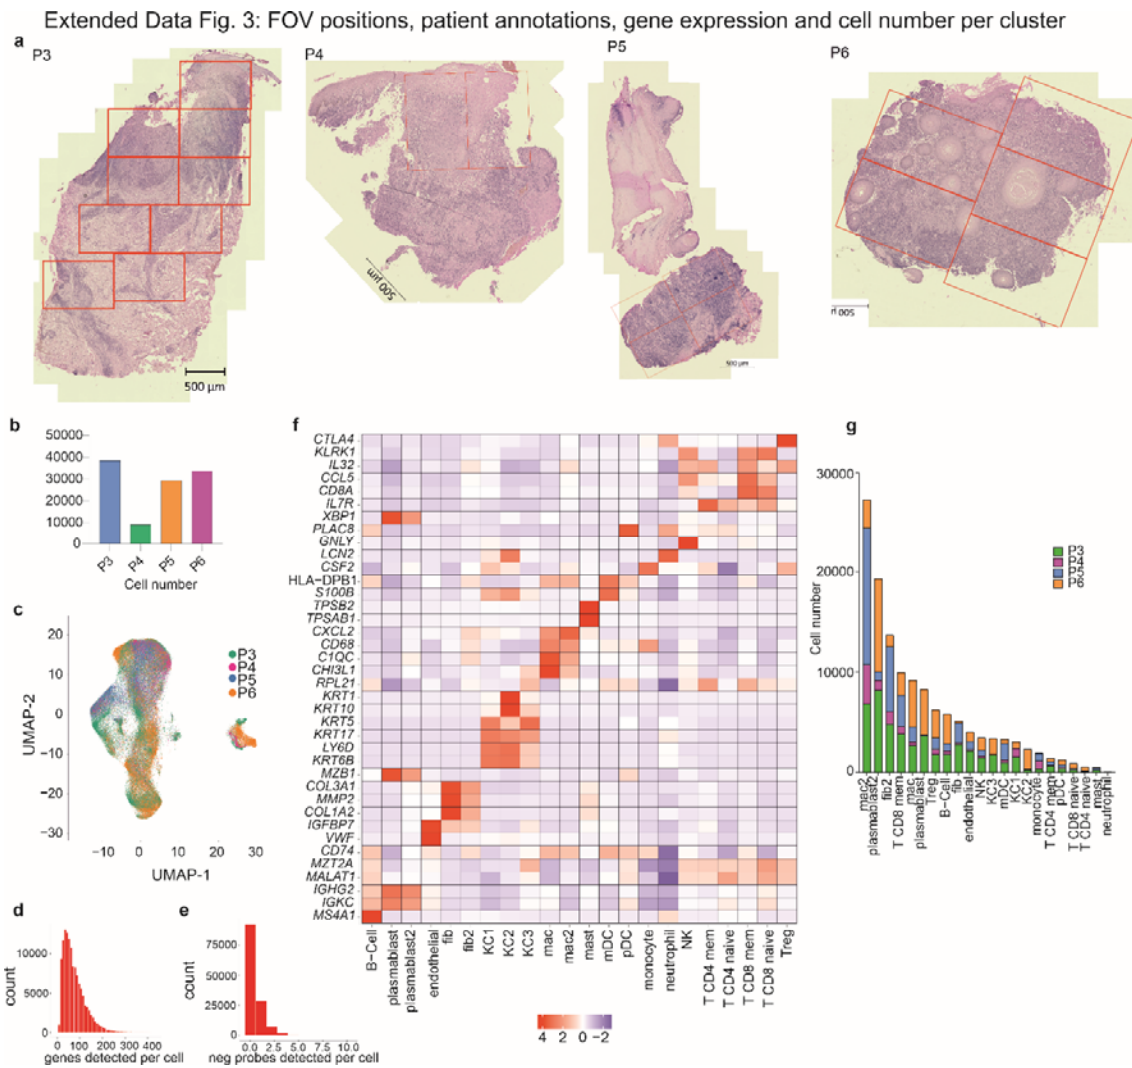

858

859 **Extended Data Fig. 3: FOV positions, patient annotations, gene expression and cell**  
 860 **number per cluster**

861 **a**, H&E images for patients P3-P6 showing FOV analysed using Nanostring CosMx. Bar 500  
 862  $\mu\text{m}$  **b**, Bar plots showing total cell numbers probed per patient. **c**, Cells were visualised in  
 863 UMAP space and coloured by patient identity. **d-e**, Bar plots showing number of genes (**d**)  
 864 and negative probes (**e**) detected per cell in the same dataset. **f**, Heat map showing top genes  
 865 expressed by the identified cell types in all 4 patients. **g**, Stacked bar plot showing total cell  
 866 counts across all patients for each population.

867

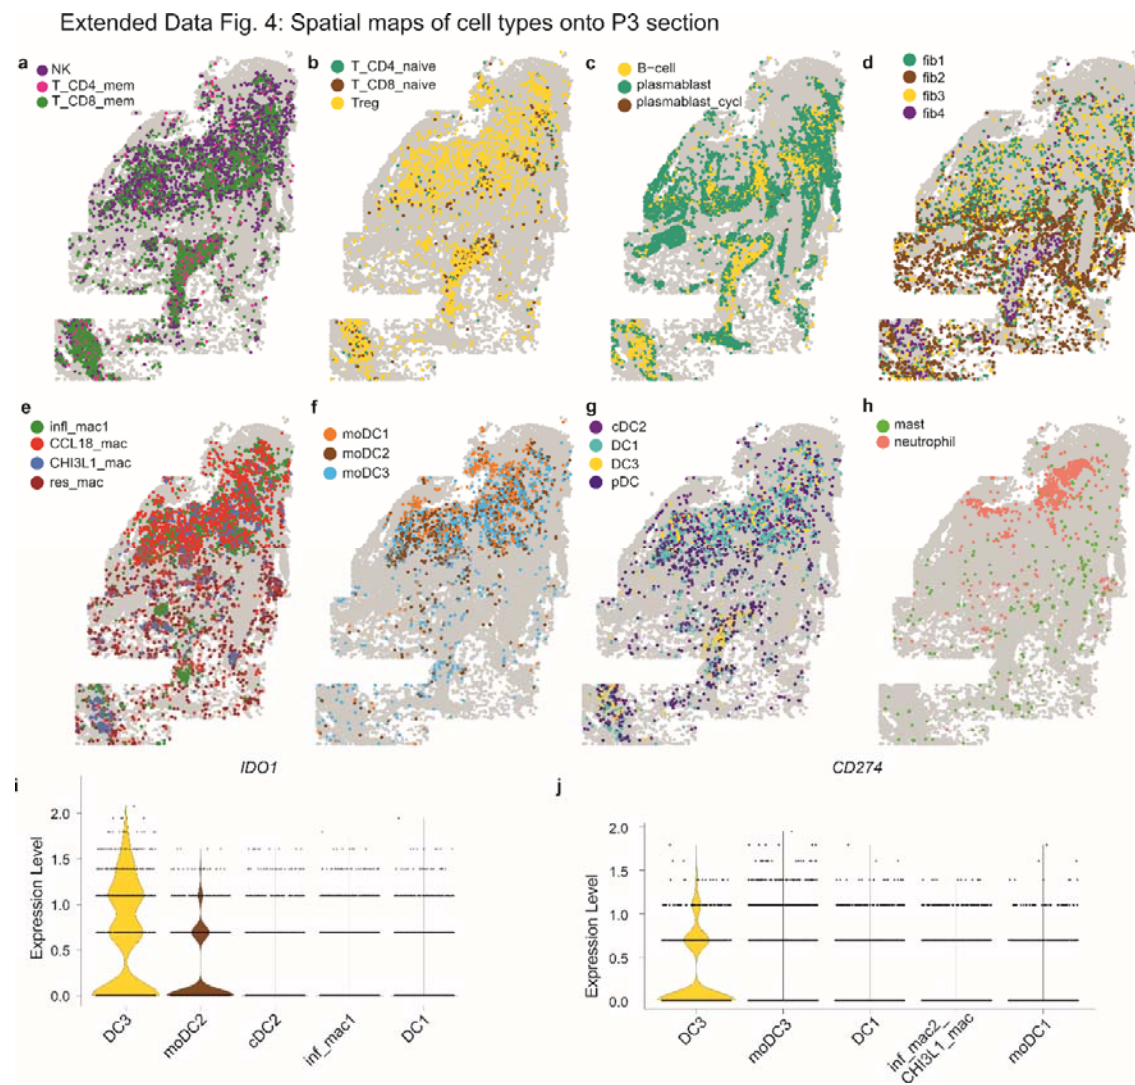

868

869

**Extended Data Fig. 4: Spatial maps of cell types onto P3 section**

870

**a-h**, Single-cell spatial mapping of indicated cell types for patient P3. **i-j**, Violin plots showing *IDO1* (**a**) and *CD274* (**b**) expression across DC3, moDC2, cDC2, infl\_mac1 and DC1 cell types (n=4 patients). Average expression of *IDO1* and *CD274* was computed across all clusters and cell types that showed upper quartile expression were plotted.

874

Fig. 3: 10x Genomics Visium: 50  $\mu\text{m}$  neighbourhoods of *IDO1*<sup>+</sup> and *CD274*<sup>+</sup> cells

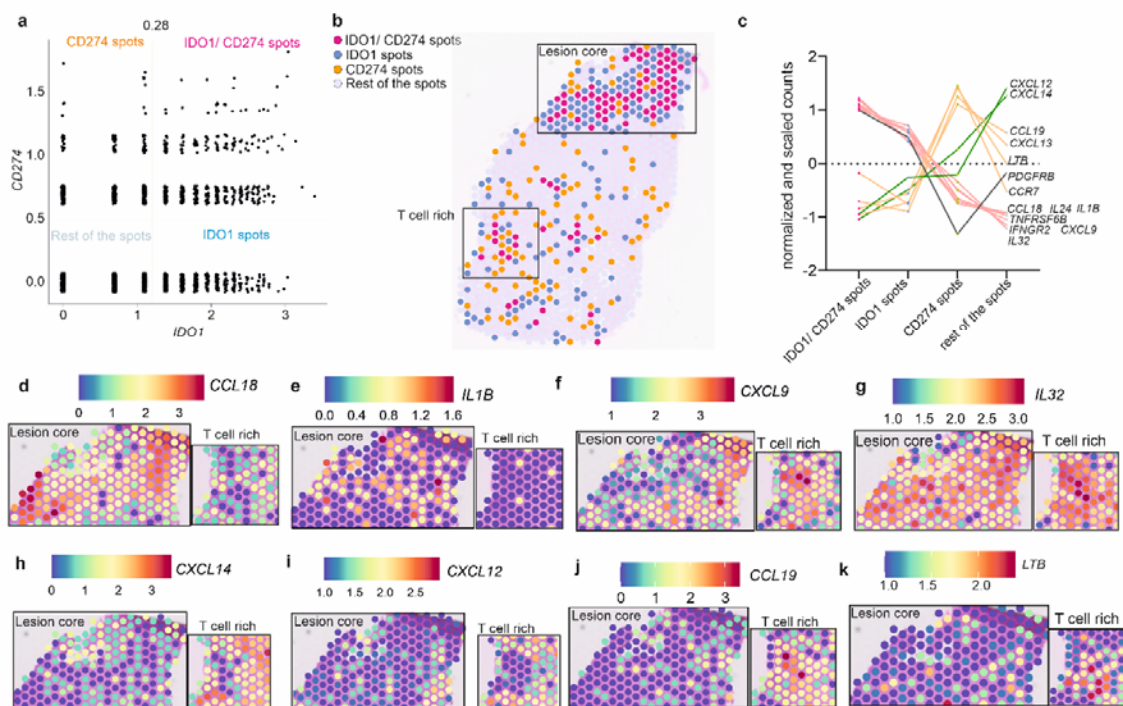

875

876

**Fig. 3: 55  $\mu\text{m}$  neighbourhoods of *IDO1*<sup>+</sup> and *CD274*<sup>+</sup> cells**

877

878

879

880

881

882

883

884

884

885

**a**, Scatterplot of *IDO1* and *CD274* normalised gene expression for all 55um Visium spots (for patients P3-P6). Thresholds were drawn at  $x=1.1$  and  $y = 0.5$  to classify spots as IDO1, CD274, IDO1/ CD274 or rest of the spots. **b**, Representative spatial plot coloured by spot class in (a) shown for P3. Insets identify lesion core and dermal T cell rich regions as inferred from Visium and CosMx datasets. **c**, Cytokine, chemokine, or receptor abundance by IDO1 and PD-L1 expression class described in (a) across  $n=4$  patients. **d-k**, Spatial feature plots for cytokines, chemokines, and interleukins from (c) in lesion core and T cell rich area for patient P3.

Extended Data Fig. 5: Characterisation of *IDO1*, *CD274* and *IDO1/CD274* rich spots

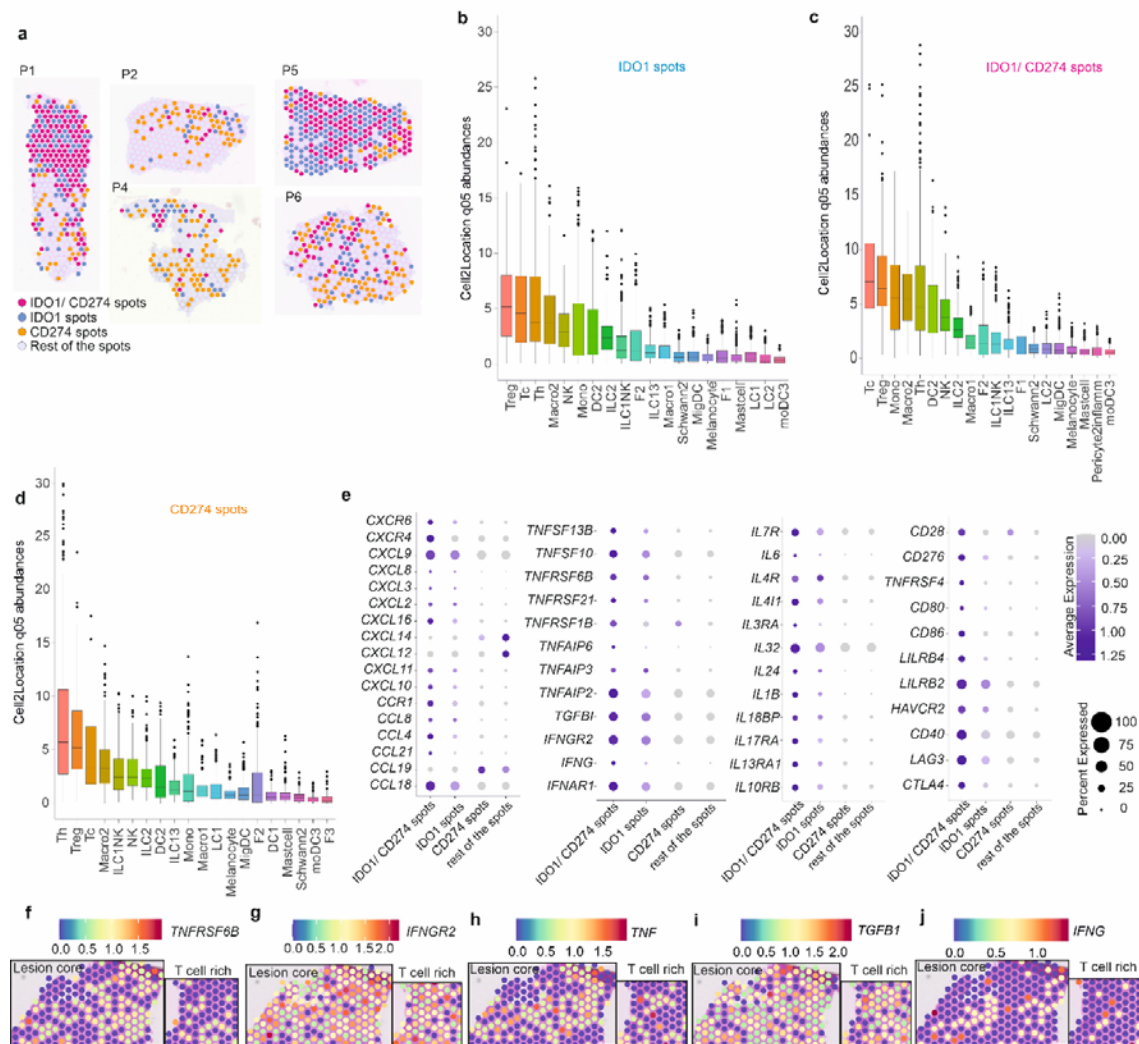

886

887

888 **Extended Data Fig. 5: Characterisation of *IDO1*, *CD274* and *IDO1/CD274* rich spots**

889 **a**, Spatial feature plots for cytokines, chemokines and interleukins for patients P1, P2, P4-P6.  
 890 **b-d**, Bar plot showing 5<sup>th</sup> quantile top 20 predicted cell abundances for IDO and PD-L1  
 891 classes defined in (a) across all patient lesions (P1-P6). Black line represents median value,  
 892 bar indicates interquartile range. **e**, Differential gene expression for selected genes across the  
 893 grouping from (a). Log2Fold change cut off was set at 0.3 and p value >0.01. Data shown is  
 894 from all 6 patients. **f-g**, Spatial feature plots for additional selected genes in lesion core and T  
 895 cell rich area for patient P3.

Fig. 4: Phenotype of *IDO1*<sup>+</sup> *CD274*<sup>+</sup> myeloid cells and neighbours

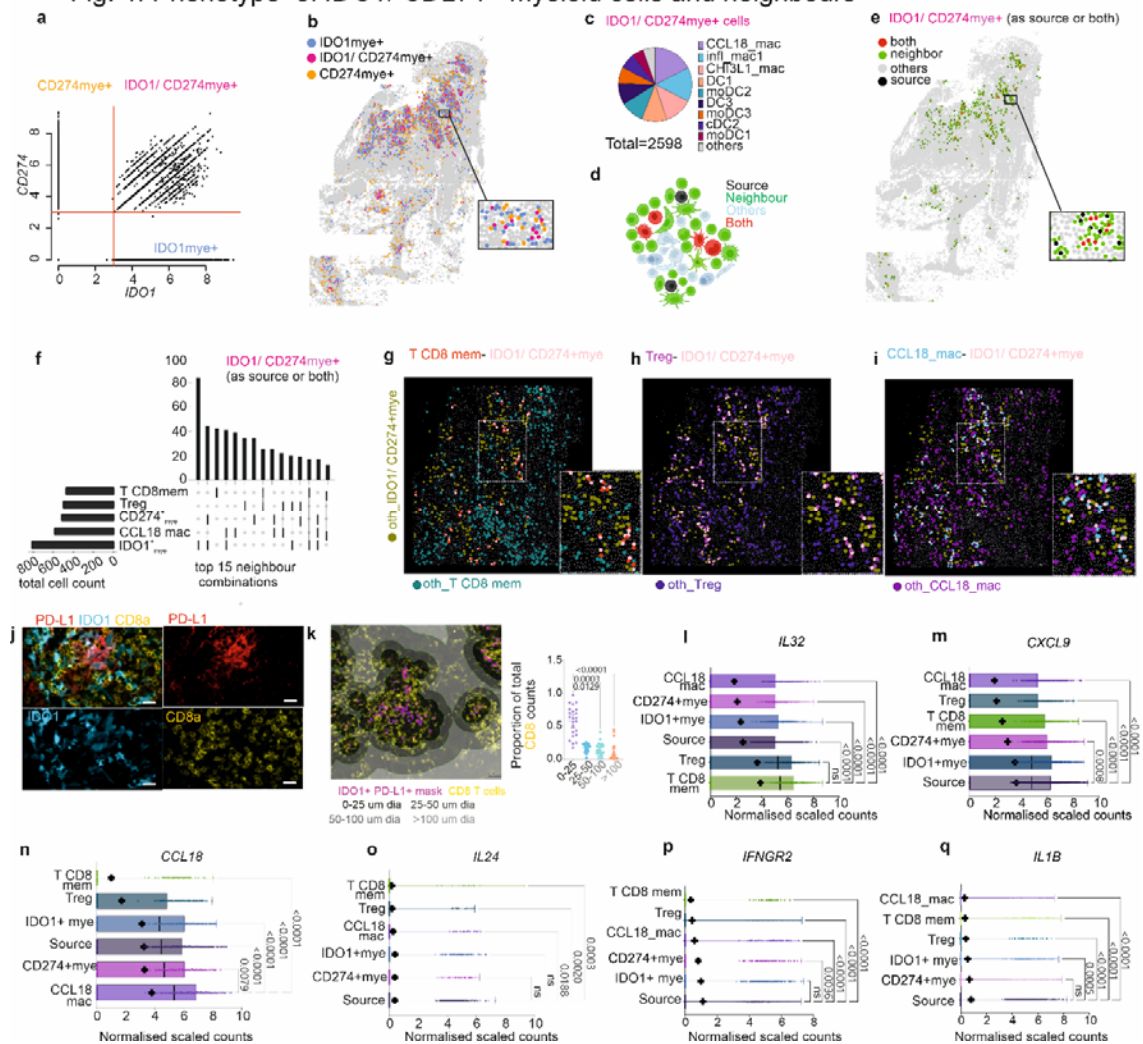

896

897 **Fig. 4: Phenotype of *IDO1*<sup>+</sup> *CD274*<sup>+</sup> myeloid cells and neighbours**

898 **a**, Scatter plot of *CD274* and *IDO1* expression on myeloid cells in CosMx dataset. Thresholds  
 899 at  $y=3$  and  $x=3$  were used to classify cells as single or double positive for *IDO1* and *CD274*  
 900 ( $n=4$  patients; P3-P6). **b**, Spatial plot for P3 coloured by class defined in (a). **c**, Pie chart of  
 901 *IDO1*<sup>+</sup> *CD274*<sup>+</sup> cells by myeloid cell subset **d**, Cartoon representation of neighbourhood  
 902 analysis (see M&M for details). **e**, Spatial map of *IDO1*<sup>+</sup> *CD274*<sup>+</sup> as “source” or “both”  
 903 shown with neighbours. **f**, UpsetR bar plot of cell types classed as neighbours of *IDO1*<sup>+</sup>/  
 904 *CD274*<sup>+</sup> cells. Top 15 neighbour combinations are shown from 2418 source neighbour  
 905 pairs. Connecting lines under the bar plot show neighbour combinations. Vertical bars  
 906 represent total numbers of each combination while the horizontal plots indicate the total  
 907 count of cell types as neighbours irrespective of the combination. **g-i**, Representative FOV  
 908 showing spatial plots of *IDO1*<sup>+</sup> *CD274*<sup>+</sup> cells (pink) interacting with CD8 mem (red  
 909 dots, **g**), Treg (magenta, **h**) and CCL18\_mac (blue in **i**). Other cells not in neighbour  
 910 combinations are depicted with an “oth\_” prefix below figure **j**, Immunohistochemistry  
 911 showing expression of *IDO1*, PD-L1 and CD8A protein expression. **k**, Quantitative image  
 912 analysis of (**j**) from  $n=23$  patients. Left panel shows imaging masks in shades of grey at 25,  
 913 50 and 100  $\mu\text{m}$  diameter from *IDO1*<sup>+</sup> PD-L1<sup>+</sup> cells. Right panel shows proportions of CD8<sup>+</sup>  
 914 cells by distance from *IDO1*<sup>+</sup> PD-L1<sup>+</sup> double positive cell. Friedman’s one-way test with

915 Dunn's adjustment for multiple comparisons. Adjusted p-values are given. **l-q**, Box and  
916 whisker plots showing minimum and maximum expression of *IL32* (**l**), *CXCL9* (**m**), *CCL18*  
917 (**n**), *IL24* (**o**), *IFNGR2* (**p**) and *IL1B* (**q**) in top 5 neighbours from (**f**). One-way Kruskal  
918 Wallis test. Mean (+) and median (vertical line) are indicated inside bars. Dunn's test  
919 corrected for multiple comparisons. Adjusted p -values are given.

920

Extended Data Fig. 6: Phenotype and neighbours of  $IDO1^+$ ,  $CD274^+$  myeloid cells

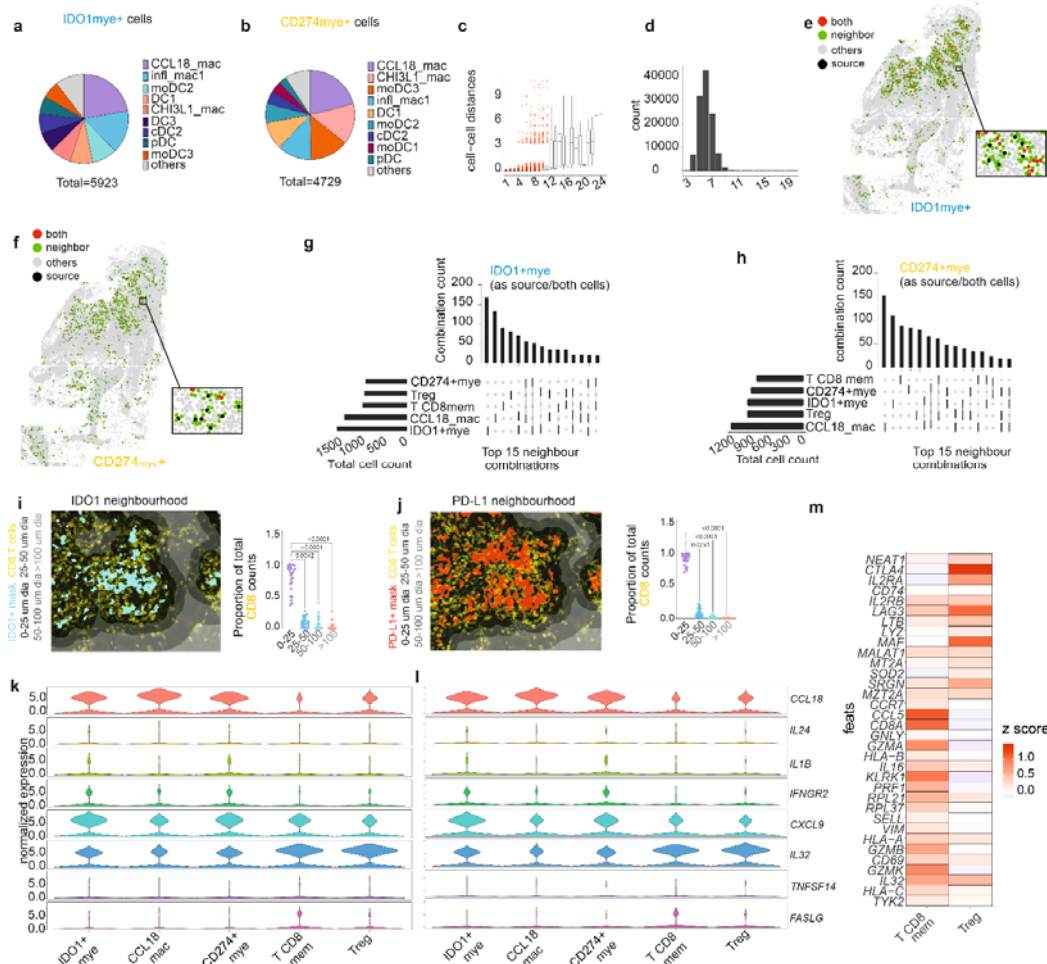

921 **Extended Data Figure 6: Phenotype and neighbours of  $IDO1^+$  and  $CD274^+$  myeloid cells**

922 **a-b**, Pie chart for  $IDO1mye^+$  (**a**) and  $CD274mye^+$  (**b**) cells by myeloid subset (n=4 patients).  
 923 **c**, Box and whiskers plots showing the cellular distances when a Delauney network is created  
 924 for up to 22 immediate neighbours. Data for n=4 patients as in (a,b). **d**, Bar plot to show  
 925 number of cells with between 3-22 immediate neighbours. **e, f**. Spatial plot of single cells for  
 926 P3 coloured with “source” or “both” being either  $IDO1mye^+$  (**e**) or  $CD274mye^+$  (**f**). **g-h**,  
 927 UpsetR plots for  $IDO1mye^+$  (**g**) or  $CD274mye^+$  (**h**) cells. 15 most frequent heterotypic  
 928 interactions are shown from n= 5370  $IDO1mye^+$  and n=4,308  $CD274mye^+$ -neighbour source  
 929 pairs, respectively. Connecting lines under the bar plot show neighbour combinations. We  
 930 have also provided all the possible neighbour combinations in the source data file  
 931 (**Supplementary Table 4**). Vertical bars represent total numbers of each combination while  
 932 the horizontal plots indicate the total count of cell types as neighbours irrespective of the  
 933 combination. **i-j**, Quantitative image analysis (n=23 patients) depicting proportions of  $CD8^+$   
 934 cells (yellow) present within 25,50, 100  $\mu m$  and  $>100 \mu m$  distance (left panels) from  $IDO1^+$   
 935 (**i**) and  $PD-L1^+$  (**j**) cells. Cyan and red cell masks are drawn over  $IDO1$  and  $PD-L1$  positive  
 936 cells respectively. Friedman’s one-way test with Dunn’s adjustment was applied for multiple  
 937 comparisons. Adjusted p-value are given. **k-l**, Violin plots showing expression of *CCL18*,  
 938 *IL24*, *IL1B*, *IFNGR2*, *CXCL9*, *IL32*, *TNFSF14* and *FASLG* in the top 5 neighbours of  
 939  $IDO1mye^+$  (**i**), and  $CD274mye^+$ (**j**) cells (n=4 patients). **m**, Heat map showing phenotype of  
 940 T CD8 memory and Treg cells. Scale shows gini coefficient z scores (n=4 patients).

## Extended Data Fig. 7: Expression of *IL32* isoforms in CL lesions

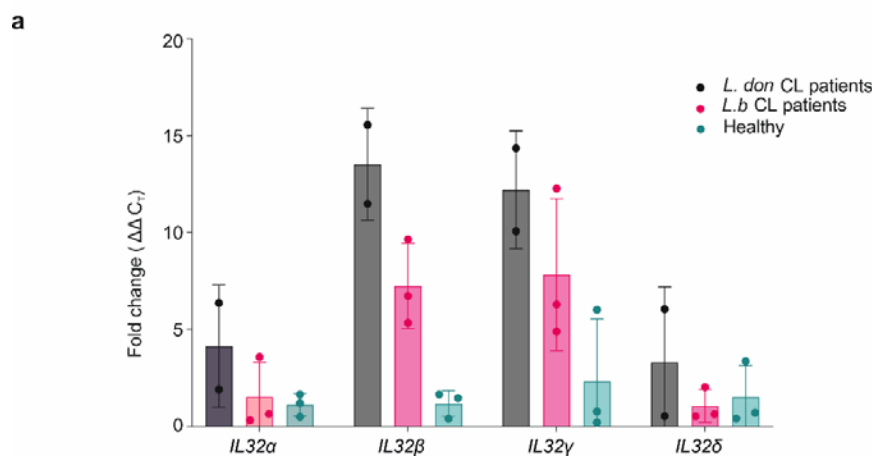

941

942

943

### 944 **Extended Data Fig. 7: Isoforms of *IL32* in CL patients**

945 **a**, Fold change of *IL32*  $\alpha$ ,  $\beta$ ,  $\gamma$  and  $\delta$  isoforms with respect to GAPDH and healthy skin in Sri  
946 Lankan CL patients (n=2) and *L.(V.) braziliensis* CL patients. Bars show mean +/- standard  
947 deviation.

948



Fig. 5 IDO1 CD274 niches in different dermal variants of leishmaniasis

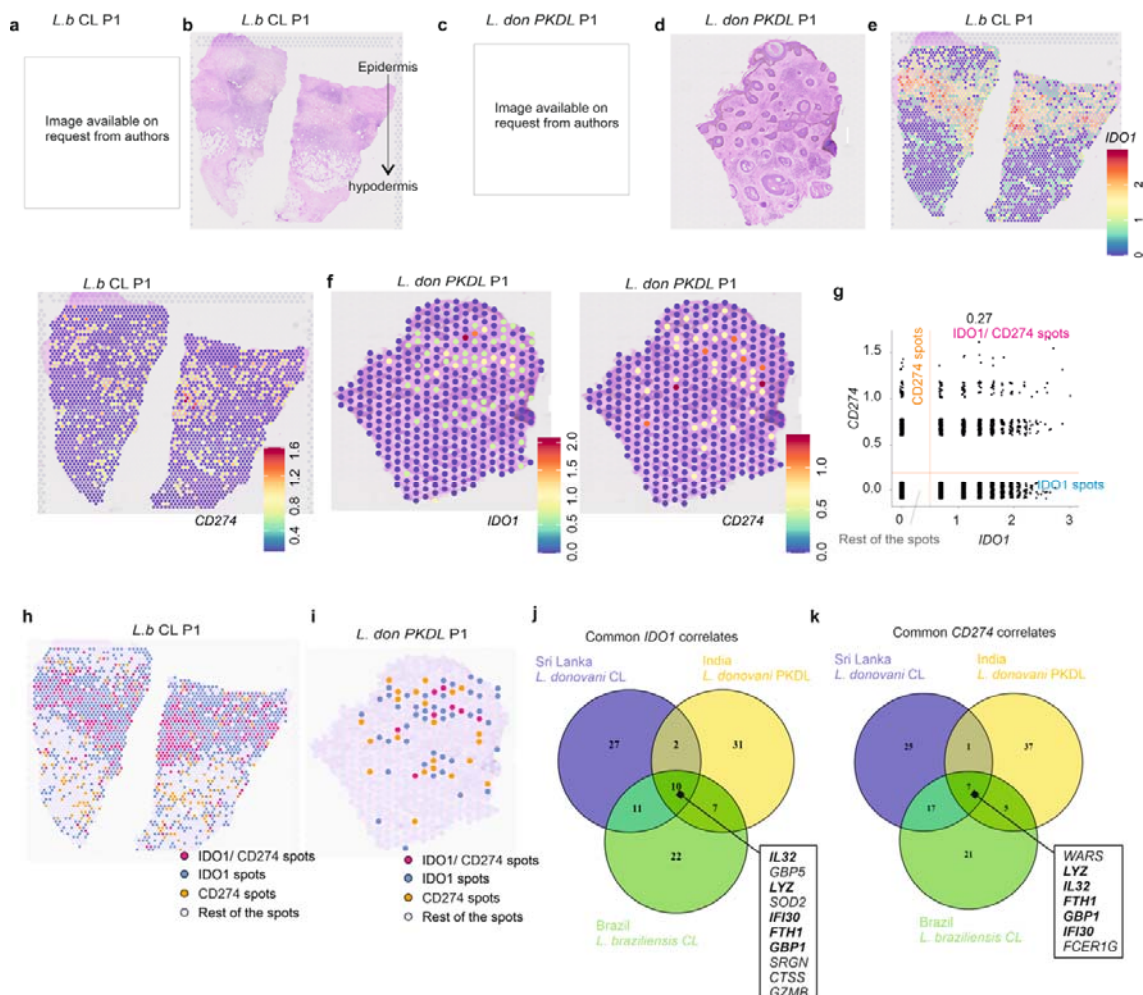

949

950

951 **Fig. 5: IDO1 and CD274 niches in different dermal variants of leishmaniasis**

952

953 **a,** CL lesion caused by *L. braziliensis* in patient Lb\_P1 from Brazil. **b,** H&E images of a 5µm

954 section from (a) showing dense cell infiltration in the dermis. **c,** Polymorphic PKDL lesion

955 caused by *L. donovani* in patient PKDL\_P1 from India. **d,** H&E image of (c). **e-f,** Spatial

956 plots showing the gene expression for IDO1 and CD274 on Lb\_P1 (e) and PKDL\_P1 (f). **g,**

957 Scatter plot showing CD274 and IDO1 expression in all spots from *L. b* infected CL skin

958 lesions (n=4). Thresholds at y=0.2 and x=0.5 used to classify spots. **h,** Spatial plot for *L. b*

959 patients coloured by class as in (g). **i,** Spatial plot of IDO1 and PD-L1 classes for PKDL

960 patients (n=2) derived from Extended Data Fig. 8h. **j-k,** Venn diagrams indicating overlap

961 amongst top 50 genes per disease correlating with IDO1 (j) and CD274 (k).

Extended Data Fig. 8: *IDO1* and *CD274* microenvironments in *L.b* CL and *L.don* PKDL lesions

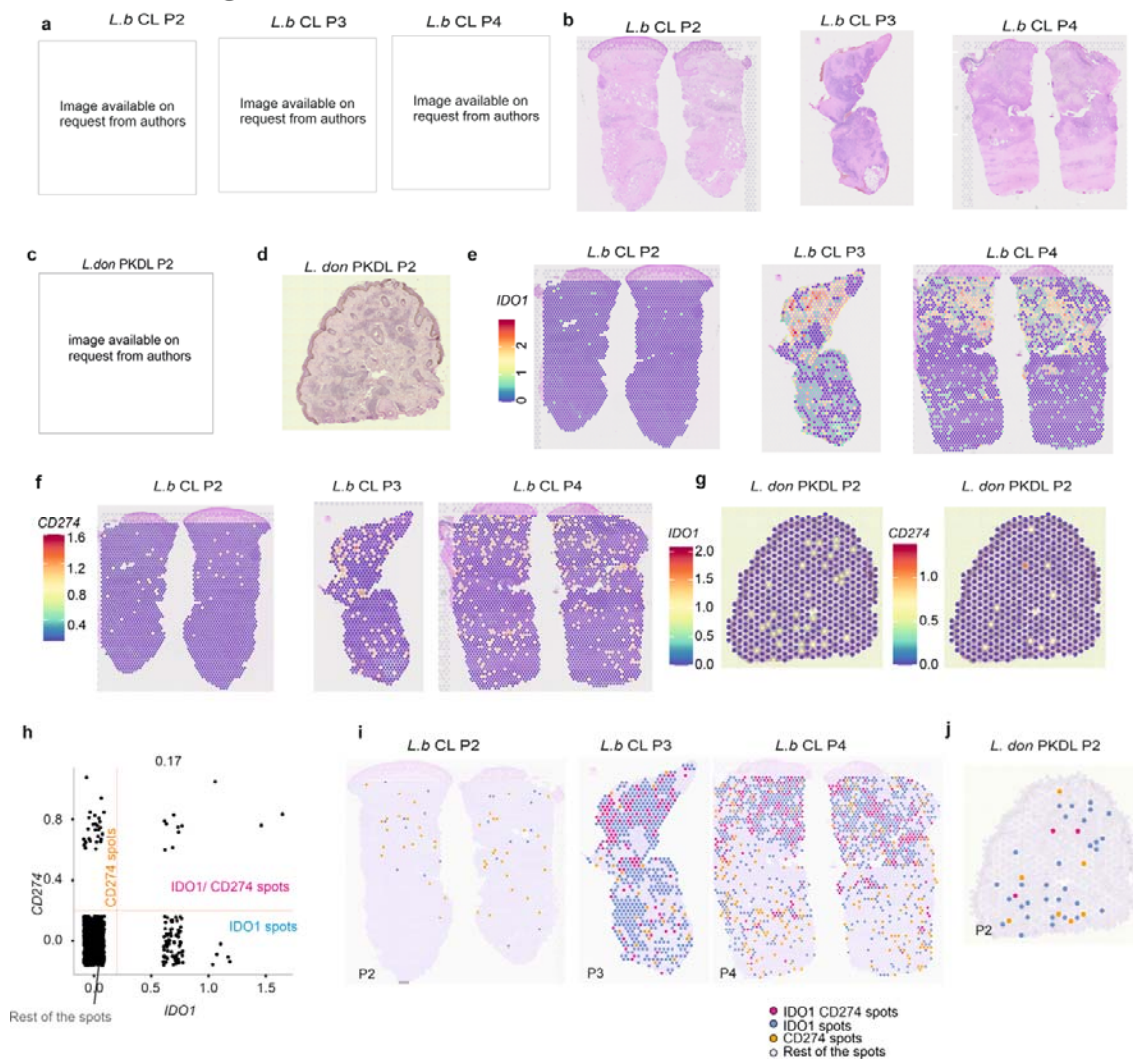

962

963 **Extended Data Fig. 8: *IDO1*+ and *CD274*+ microenvironments in *L. braziliensis* and *L.***  
 964 ***donovani* infected CL and PKDL lesions respectively.**

965 **a**, CL lesions caused by *L. braziliensis*. Images for patients *L.b*\_P2-P4. **b**, Matched H&E  
 966 images of 5µm sections of lesions in (a). Mild inflammatory infiltrate and extensive fibrosis  
 967 was seen in *L.b*\_P2. **c-d**, Macular PKDL lesion caused by *L. donovani*. Image for patient  
 968 PKDL\_P2 (c) and corresponding histology shown in an H&E image (d). **e-f**, Spatial plots  
 969 showing gene expression for *IDO1* (e) and *CD274* (f) for patients *L. b*\_P2-P4. P2 showed  
 970 very limited expression of *IDO1* and *CD274* with no overlap between the two expression  
 971 patterns. **g**, Spatial plots showing the gene expression of *IDO1* (c) and *CD274* (d) for macular  
 972 *L. don* PKDL\_P2. **h**, Scatter plot showing *CD274* and *IDO1* expression across all spots from  
 973 *L. don* PKDL\_P1 and P2, with thresholds at  $y=0.2$  and  $x=0.2$ . **i-j**, Spatial plots coloured by  
 974 class for *L.b*\_P2-4 (i) and PKDL\_P2 (j).

975

976

Extended Data Fig. 9: Phenotyping *IDO1* and *CD274* microenvironments in *L.b* CL and *L.don* PKDL lesions

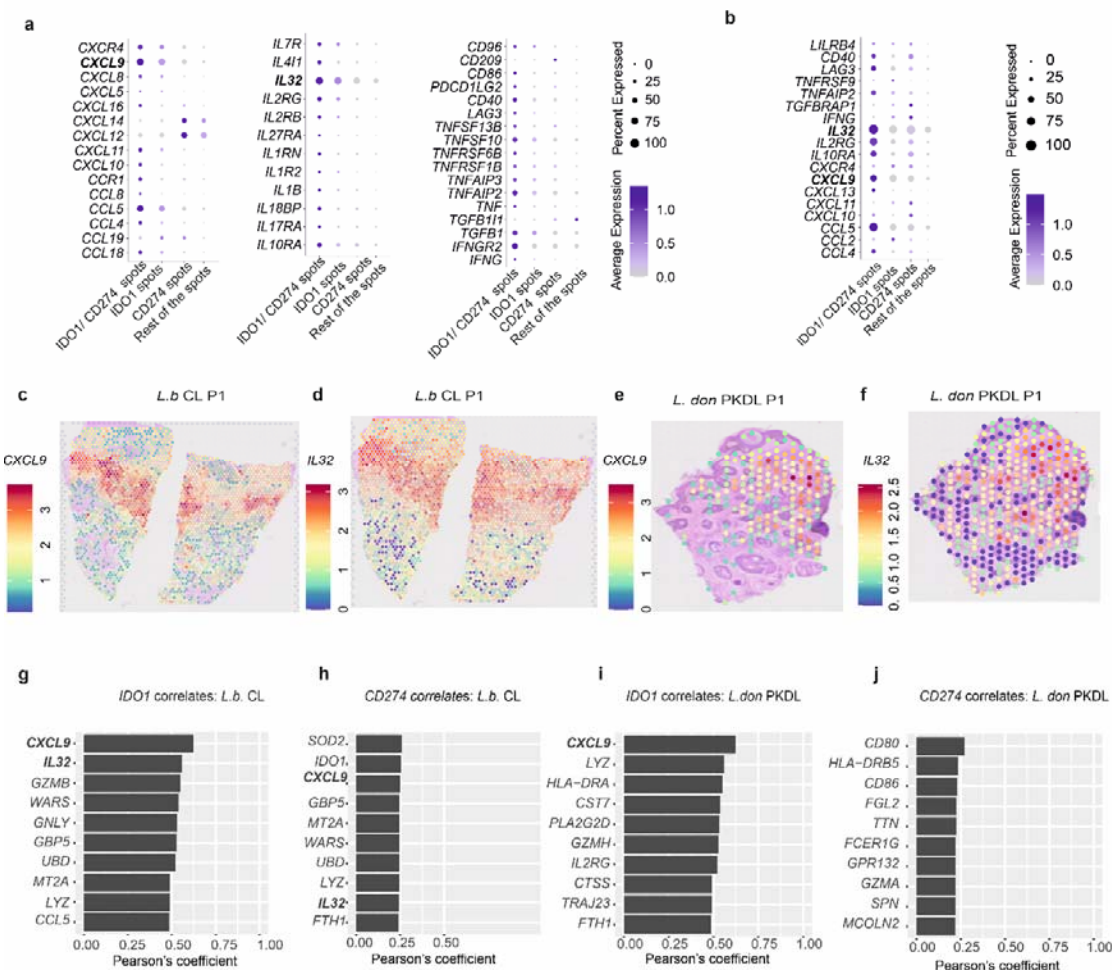

977

978

979 **Extended Data Fig. 9: Phenotyping *IDO1*<sup>+</sup> and *CD274*<sup>+</sup> microenvironments in *L.***  
 980 ***braziliensis* CL and *L. donovani* PKDL and lesions.**

981 **a**, Dot plot showing differentially expressed cytokines, chemokines, interleukins, TNF and  
 982 interfeon related and immune checkpoint markers between *IDO1* and *CD274* classes in *L.b.*  
 983 CL patients (n=4; a) and PKDL patients (n=2, b). Cut off was p<0.05, Log2Fold = 0.25. **c-f**,  
 984 Spatial plots showing gene expression for *CXCL9* and *IL32* in *L.b*\_P1 and PKDL\_ P1. **g-j**,  
 985 Genes correlating with *IDO1* (**g,i**), and *CD274* (**h, j**) from all *L. b.* CL patients (g,h) and  
 986 PKDL patients (i-j). Pearson's correlation coefficients are plotted in decreasing order  
 987 (p<0.05).

988

Fig. 6: Lesional IL-32 expression is prognostic of cure rate in Sri Lanka

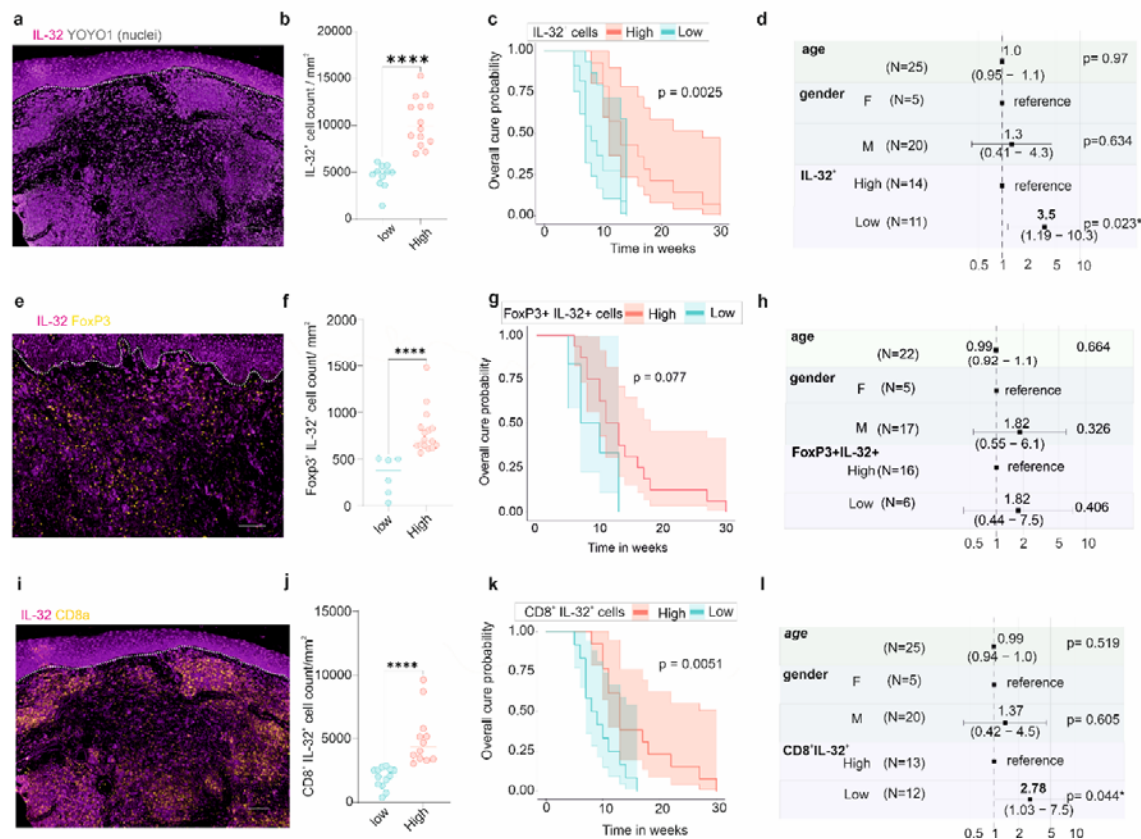

989

990

991 **Fig. 6 Lesion IL-32<sup>+</sup> T cells are prognostic for rate of cure following treatment for CL in**  
 992 **Sri Lanka**

993 **a**, IL-32 protein expression in Sri Lankan CL. **b**, Stratification of 25 patients based on  
 994 geomean density of dermal IL-32<sup>+</sup> cells (low, n=11, High, n=14). Horizontal bars indicate  
 995 median value. \*\*\*\* p-value <0.0001 (Two-tailed Mann Whitney test). **c**, Kaplan Meier plot  
 996 showing treatment response rate for IL-32 Low and High groups. Shaded area indicates 95%  
 997 CI. p-value for Log rank (Mantel-Cox) test is shown. **d**, Forest plot of Cox proportional  
 998 hazard model for IL-32<sup>+</sup> low vs. IL-32<sup>+</sup> high (reference), adjusted for age and sex. Hazard  
 999 ratio (HR; 95% CI) and p value for each covariate is shown. **e-h**. same as (a-d) for IL-32<sup>+</sup>  
 1000 FoxP3<sup>+</sup> cells (n=22 patients) **i-l**, same as (a-d) for IL-32<sup>+</sup>CD8α<sup>+</sup> cells (n=25 patients). Scale  
 1001 bar in (a), (e), and (i) is 100 μm.

## 1002 **References**

- 1003 1. Scott, P. & Novais, F.O. Cutaneous leishmaniasis: immune responses in protection and  
1004 pathogenesis. *Nat Rev Immunol* **16**, 581-592 (2016).
- 1005 2. Heyde, S. *et al.* CD11c-expressing Ly6C+CCR2+ monocytes constitute a reservoir for efficient  
1006 Leishmania proliferation and cell-to-cell transmission. *PLoS Pathog* **14**, e1007374 (2018).
- 1007 3. Costa-da-Silva, A.C. *et al.* Immune Responses in Leishmaniasis: An Overview. *Trop Med Infect*  
1008 *Dis* **7** (2022).
- 1009 4. Samant, M., Sahu, U., Pandey, S.C. & Khare, P. Role of Cytokines in Experimental and Human  
1010 Visceral Leishmaniasis. *Front Cell Infect Microbiol* **11**, 624009 (2021).
- 1011 5. Bogdan, C. Macrophages as host, effector and immunoregulatory cells in leishmaniasis:  
1012 Impact of tissue micro-environment and metabolism. *Cytokine X* **2**, 100041 (2020).
- 1013 6. Novais, F.O. & Scott, P. CD8+ T cells in cutaneous leishmaniasis: the good, the bad, and the  
1014 ugly. *Semin Immunopathol* **37**, 251-259 (2015).
- 1015 7. Lecoeur, H., Prina, E., Gutierrez-Sanchez, M. & Spath, G.F. Going ballistic: Leishmania nuclear  
1016 subversion of host cell plasticity. *Trends Parasitol* **38**, 205-216 (2022).
- 1017 8. Sacks, D. & Noben-Trauth, N. The immunology of susceptibility and resistance to Leishmania  
1018 major in mice. *Nat Rev Immunol* **2**, 845-858 (2002).
- 1019 9. Tomiotto-Pellissier, F. *et al.* Macrophage Polarization in Leishmaniasis: Broadening Horizons.  
1020 *Front Immunol* **9**, 2529 (2018).
- 1021 10. Ajdary, S., Alimohammadian, M.H., Eslami, M.B., Kemp, K. & Kharazmi, A. Comparison of the  
1022 immune profile of nonhealing cutaneous Leishmaniasis patients with those with active  
1023 lesions and those who have recovered from infection. *Infect Immun* **68**, 1760-1764 (2000).
- 1024 11. Manamperi, N.H. *et al.* In situ immunopathological changes in cutaneous leishmaniasis due  
1025 to Leishmania donovani. *Parasite Immunol* **39** (2017).
- 1026 12. Montes de Oca, M. *et al.* Blimp-1-Dependent IL-10 Production by Tr1 Cells Regulates TNF-  
1027 Mediated Tissue Pathology. *PLoS Pathog* **12**, e1005398 (2016).
- 1028 13. Katara, G.K., Ansari, N.A., Verma, S., Ramesh, V. & Salotra, P. Foxp3 and IL-10 expression  
1029 correlates with parasite burden in lesional tissues of post kala azar dermal leishmaniasis  
1030 (PKDL) patients. *PLoS Negl Trop Dis* **5**, e1171 (2011).
- 1031 14. Bourreau, E., Prevot, G., Gardon, J., Pradinaud, R. & Launois, P. High intralesional interleukin-  
1032 10 messenger RNA expression in localized cutaneous leishmaniasis is associated with  
1033 unresponsiveness to treatment. *J Infect Dis* **184**, 1628-1630 (2001).
- 1034 15. Amorim, C.F. *et al.* Variable gene expression and parasite load predict treatment outcome in  
1035 cutaneous leishmaniasis. *Sci Transl Med* **11** (2019).
- 1036 16. de Freitas, E.S.R. & von Stebut, E. Unraveling the Role of Immune Checkpoints in  
1037 Leishmaniasis. *Front Immunol* **12**, 620144 (2021).
- 1038 17. Wykes, M.N. & Lewin, S.R. Immune checkpoint blockade in infectious diseases. *Nat Rev*  
1039 *Immunol* **18**, 91-104 (2018).
- 1040 18. Paluch, C., Santos, A.M., Anzilotti, C., Cornall, R.J. & Davis, S.J. Immune Checkpoints as  
1041 Therapeutic Targets in Autoimmunity. *Front Immunol* **9**, 2306 (2018).

- 1042 19. He, X. & Xu, C. Immune checkpoint signaling and cancer immunotherapy. *Cell Res* **30**, 660-1043 669 (2020).
- 1044 20. Carlin, J.M., Borden, E.C., Sondel, P.M. & Byrne, G.I. Interferon-induced indoleamine 2,3-1045 dioxxygenase activity in human mononuclear phagocytes. *J Leukoc Biol* **45**, 29-34 (1989).
- 1046 21. Popov, A. & Schultze, J.L. IDO-expressing regulatory dendritic cells in cancer and chronic1047 infection. *J Mol Med (Berl)* **86**, 145-160 (2008).
- 1048 22. Merlo, L.M.F., Peng, W. & Mandik-Nayak, L. Impact of IDO1 and IDO2 on the B Cell Immune1049 Response. *Front Immunol* **13**, 886225 (2022).
- 1050 23. Munn, D.H. *et al.* Inhibition of T cell proliferation by macrophage tryptophan catabolism. *J1051 Exp Med* **189**, 1363-1372 (1999).
- 1052 24. Munn, D.H. *et al.* Expression of indoleamine 2,3-dioxygenase by plasmacytoid dendritic cells1053 in tumor-draining lymph nodes. *J Clin Invest* **114**, 280-290 (2004).
- 1054 25. Fallarino, F. *et al.* The combined effects of tryptophan starvation and tryptophan catabolites1055 down-regulate T cell receptor zeta-chain and induce a regulatory phenotype in naive T cells.1056 *J Immunol* **176**, 6752-6761 (2006).
- 1057 26. Huang, X., Zhang, F., Wang, X. & Liu, K. The Role of Indoleamine 2, 3-Dioxygenase 1 in1058 Regulating Tumor Microenvironment. *Cancers (Basel)* **14** (2022).
- 1059 27. Makala, L.H. *et al.* Leishmania major attenuates host immunity by stimulating local1060 indoleamine 2,3-dioxygenase expression. *J Infect Dis* **203**, 715-725 (2011).
- 1061 28. Lu, D. *et al.* Beyond T Cells: Understanding the Role of PD-1/PD-L1 in Tumor-Associated1062 Macrophages. *J Immunol Res* **2019**, 1919082 (2019).
- 1063 29. Ludovini, V. *et al.* High PD-L1/IDO-2 and PD-L2/IDO-1 Co-Expression Levels Are Associated1064 with Worse Overall Survival in Resected Non-Small Cell Lung Cancer Patients. *Genes (Basel)*1065 **12** (2021).
- 1066 30. Della Corte, C.M. *et al.* Triple blockade of Ido-1, PD-L1 and MEK as a potential therapeutic1067 strategy in NSCLC. *J Transl Med* **20**, 541 (2022).
- 1068 31. Kjeldsen, J.W. *et al.* A phase 1/2 trial of an immune-modulatory vaccine against IDO/PD-L1 in1069 combination with nivolumab in metastatic melanoma. *Nat Med* **27**, 2212-2223 (2021).
- 1070 32. Dey, N.S. *et al.* Early reduction in PD-L1 expression predicts faster treatment response in1071 human cutaneous leishmaniasis. *J Clin Invest* **131** (2021).
- 1072 33. Keren, L. *et al.* A Structured Tumor-Immune Microenvironment in Triple Negative Breast1073 Cancer Revealed by Multiplexed Ion Beam Imaging. *Cell* **174**, 1373-1387 e1319 (2018).
- 1074 34. Schalper, K.A. *et al.* Differential Expression and Significance of PD-L1, IDO-1, and B7-H4 in1075 Human Lung Cancer. *Clin Cancer Res* **23**, 370-378 (2017).
- 1076 35. McCaffrey, E.F. *et al.* The immunoregulatory landscape of human tuberculosis granulomas.1077 *Nat Immunol* **23**, 318-329 (2022).
- 1078 36. Lima, H.R. *et al.* Immune Checkpoints in Leprosy: Immunotherapy As a Feasible Approach to1079 Control Disease Progression. *Front Immunol* **8**, 1724 (2017).
- 1080 37. Gulati, N., Suarez-Farinas, M., Correa da Rosa, J. & Krueger, J.G. Psoriasis is characterized by1081 deficient negative immune regulation compared to transient delayed-type hypersensitivity1082 reactions. *F1000Res* **4**, 149 (2015).

- 1083 38. Reynolds, G. *et al.* Developmental cell programs are co-opted in inflammatory skin disease.  
1084 *Science* **371** (2021).
- 1085 39. Pallotta, M.T. *et al.* Indoleamine 2,3-dioxygenase 1 (IDO1): an up-to-date overview of an  
1086 eclectic immunoregulatory enzyme. *FEBS J* **289**, 6099-6118 (2022).
- 1087 40. Liu, M. *et al.* Targeting the IDO1 pathway in cancer: from bench to bedside. *J Hematol Oncol*  
1088 **11**, 100 (2018).
- 1089 41. Shklovskaya, E. & Rizos, H. Spatial and Temporal Changes in PD-L1 Expression in Cancer: The  
1090 Role of Genetic Drivers, Tumor Microenvironment and Resistance to Therapy. *Int J Mol Sci*  
1091 **21** (2020).
- 1092 42. Chen, S. *et al.* Mechanisms regulating PD-L1 expression on tumor and immune cells. *J*  
1093 *Immunother Cancer* **7**, 305 (2019).
- 1094 43. da Fonseca-Martins, A.M. *et al.* Leishmania Parasites Drive PD-L1 Expression in Mice and  
1095 Human Neutrophils With Suppressor Capacity. *Front Immunol* **12**, 598943 (2021).
- 1096 44. Donovan, M.J. *et al.* Indoleamine 2,3-dioxygenase (IDO) induced by Leishmania infection of  
1097 human dendritic cells. *Parasite Immunol* **34**, 464-472 (2012).
- 1098 45. Hofmeyer, K.A., Jeon, H. & Zang, X. The PD-1/PD-L1 (B7-H1) pathway in chronic infection-  
1099 induced cytotoxic T lymphocyte exhaustion. *J Biomed Biotechnol* **2011**, 451694 (2011).
- 1100 46. Barth, H. & Raghuraman, S. Persistent infectious diseases say - IDO. Role of indoleamine-2,3-  
1101 dioxygenase in disease pathogenesis and implications for therapy. *Crit Rev Microbiol* **40**,  
1102 360-368 (2014).
- 1103 47. Xia, C., Braunstein, Z., Toomey, A.C., Zhong, J. & Rao, X. S100 Proteins As an Important  
1104 Regulator of Macrophage Inflammation. *Front Immunol* **8**, 1908 (2017).
- 1105 48. Chenivesse, C. *et al.* Pulmonary CCL18 recruits human regulatory T cells. *J Immunol* **189**, 128-  
1106 137 (2012).
- 1107 49. Barkal, A.A. *et al.* CD24 signalling through macrophage Siglec-10 is a target for cancer  
1108 immunotherapy. *Nature* **572**, 392-396 (2019).
- 1109 50. Vogt, L. *et al.* VSIG4, a B7 family-related protein, is a negative regulator of T cell activation. *J*  
1110 *Clin Invest* **116**, 2817-2826 (2006).
- 1111 51. Coletta, S. *et al.* The immune receptor CD300e negatively regulates T cell activation by  
1112 impairing the STAT1-dependent antigen presentation. *Sci Rep* **10**, 16501 (2020).
- 1113 52. Kleshchevnikov, V. *et al.* Cell2location maps fine-grained cell types in spatial transcriptomics.  
1114 *Nat Biotechnol* **40**, 661-671 (2022).
- 1115 53. He, S. *et al.* High-plex imaging of RNA and proteins at subcellular resolution in fixed tissue by  
1116 spatial molecular imaging. *Nat Biotechnol* **40**, 1794-1806 (2022).
- 1117 54. Cambier, S., Gouwy, M. & Proost, P. The chemokines CXCL8 and CXCL12: molecular and  
1118 functional properties, role in disease and efforts towards pharmacological intervention. *Cell*  
1119 *Mol Immunol* **20**, 217-251 (2023).
- 1120
- 1121 55. Frederick, M.J. *et al.* In vivo expression of the novel CXC chemokine BRAK in normal and  
1122 cancerous human tissue. *Am J Pathol* **156**, 1937-1950 (2000).

- 1123 56. Dries, R. *et al.* Giotto: a toolbox for integrative analysis and visualization of spatial expression  
1124 data. *Genome Biol* **22**, 78 (2021).
- 1125 57. Lex, A., Gehlenborg, N., Strobel, H., Vuilleumot, R. & Pfister, H. UpSet: Visualization of  
1126 Intersecting Sets. *IEEE Trans Vis Comput Graph* **20**, 1983-1992 (2014).
- 1127 58. Liu, Y. *et al.* Myeloma-derived IL-32gamma induced PD-L1 expression in macrophages  
1128 facilitates immune escape via the PFKFB3-JAK1 axis. *Oncoimmunology* **11**, 2057837 (2022).
- 1129 59. Ohmatsu, H. *et al.* IL-32 induces indoleamine 2,3-dioxygenase(+)CD1c(+) dendritic cells and  
1130 indoleamine 2,3-dioxygenase(+)CD163(+) macrophages: Relevance to mycosis fungoides  
1131 progression. *Oncoimmunology* **6**, e1181237 (2017).
- 1132 60. Yan, H. *et al.* Multiple myeloma cell-derived IL-32gamma increases the immunosuppressive  
1133 function of macrophages by promoting indoleamine 2,3-dioxygenase (IDO) expression.  
1134 *Cancer Lett* **446**, 38-48 (2019).
- 1135 61. Galdino, H., Jr. *et al.* Interleukin 32gamma (IL-32gamma) is highly expressed in cutaneous  
1136 and mucosal lesions of American Tegumentary Leishmaniasis patients: association with  
1137 tumor necrosis factor (TNF) and IL-10. *BMC Infect Dis* **14**, 249 (2014).
- 1138 62. Farias Amorim, C. *et al.* Localized skin inflammation during cutaneous leishmaniasis drives a  
1139 chronic, systemic IFN-gamma signature. *PLoS Negl Trop Dis* **15**, e0009321 (2021).
- 1140 63. Kong, F. *et al.* Transcriptional Profiling in Experimental Visceral Leishmaniasis Reveals a  
1141 Broad Splenic Inflammatory Environment that Conditions Macrophages toward a Disease  
1142 Promoting Phenotype. *PLoS Pathog* **13**, e1006165 (2017).
- 1143 64. Rodrigues, V. *et al.* Transcriptional Analysis of Human Skin Lesions Identifies Tryptophan-2,3-  
1144 Deoxygenase as a Restriction Factor for Cutaneous Leishmania. *Front Cell Infect Microbiol* **9**,  
1145 338 (2019).
- 1146 65. Christensen, S.M. *et al.* Meta-transcriptome Profiling of the Human-Leishmania braziliensis  
1147 Cutaneous Lesion. *PLoS Negl Trop Dis* **10**, e0004992 (2016).
- 1148 66. Shekarian, T. *et al.* Immunotherapy of glioblastoma explants induces interferon-gamma  
1149 responses and spatial immune cell rearrangements in tumor center, but not periphery. *Sci*  
1150 *Adv* **8**, eabn9440 (2022).
- 1151 67. Shin, E.C., Sung, P.S. & Park, S.H. Immune responses and immunopathology in acute and  
1152 chronic viral hepatitis. *Nat Rev Immunol* **16**, 509-523 (2016).
- 1153 68. Chevalier, M.F. & Weiss, L. The split personality of regulatory T cells in HIV infection. *Blood*  
1154 **121**, 29-37 (2013).
- 1155 69. Winheim, E. *et al.* Impaired function and delayed regeneration of dendritic cells in COVID-19.  
1156 *PLoS Pathog* **17**, e1009742 (2021).
- 1157 70. Pett, S.L. *et al.* Increased Indoleamine-2,3-Dioxygenase Activity Is Associated With Poor  
1158 Clinical Outcome in Adults Hospitalized With Influenza in the INSIGHT FLU003Plus Study.  
1159 *Open Forum Infect Dis* **5**, ofx228 (2018).
- 1160 71. Tang, Q. *et al.* The role of PD-1/PD-L1 and application of immune-checkpoint inhibitors in  
1161 human cancers. *Front Immunol* **13**, 964442 (2022).
- 1162 72. Danenberg, E. *et al.* Breast tumor microenvironment structures are associated with genomic  
1163 features and clinical outcome. *Nat Genet* **54**, 660-669 (2022).



- 1164 73. Hoch, T. *et al.* Multiplexed imaging mass cytometry of the chemokine milieu in melanoma  
1165 characterizes features of the response to immunotherapy. *Sci Immunol* **7**, eabk1692 (2022).
- 1166 74. Honkala, A.T., Taylor, D. & Malhotra, S.V. Guanylate-Binding Protein 1: An Emerging Target in  
1167 Inflammation and Cancer. *Front Immunol* **10**, 3139 (2019).
- 1168 75. Hu, Z.W. *et al.* Ferroptosis Driver SOCS1 and Suppressor FTH1 Independently Correlate With  
1169 M1 and M2 Macrophage Infiltration in Head and Neck Squamous Cell Carcinoma. *Front Cell*  
1170 *Dev Biol* **9**, 727762 (2021).
- 1171 76. Moll, H., Flohe, S. & Rollinghoff, M. Dendritic cells in Leishmania major-immune mice harbor  
1172 persistent parasites and mediate an antigen-specific T cell immune response. *Eur J Immunol*  
1173 **25**, 693-699 (1995).
- 1174 77. Lee, S.H. *et al.* Mannose receptor high, M2 dermal macrophages mediate nonhealing  
1175 Leishmania major infection in a Th1 immune environment. *J Exp Med* **215**, 357-375 (2018).
- 1176 78. Romano, A. *et al.* Divergent roles for Ly6C+CCR2+CX3CR1+ inflammatory monocytes during  
1177 primary or secondary infection of the skin with the intra-phagosomal pathogen Leishmania  
1178 major. *PLoS Pathog* **13**, e1006479 (2017).
- 1179 79. Tietscher, S. *et al.* A comprehensive single-cell map of T cell exhaustion-associated immune  
1180 environments in human breast cancer. *Nat Commun* **14**, 98 (2023).
- 1181 80. Adema, G.J. *et al.* A dendritic-cell-derived C-C chemokine that preferentially attracts naive T  
1182 cells. *Nature* **387**, 713-717 (1997).
- 1183 81. Cardoso, A.P. *et al.* The immunosuppressive and pro-tumor functions of CCL18 at the tumor  
1184 microenvironment. *Cytokine Growth Factor Rev* **60**, 107-119 (2021).
- 1185 82. Rao, L.Z. *et al.* IL-24 deficiency protects mice against bleomycin-induced pulmonary fibrosis  
1186 by repressing IL-4-induced M2 program in macrophages. *Cell Death Differ* **28**, 1270-1283  
1187 (2021).
- 1188 83. Hsieh, S.L. & Lin, W.W. Decoy receptor 3: an endogenous immunomodulator in cancer  
1189 growth and inflammatory reactions. *J Biomed Sci* **24**, 39 (2017).
- 1190 84. del Rio, M.L. *et al.* Immunotherapeutic targeting of LIGHT/LTbetaR/HVEM pathway fully  
1191 recapitulates the reduced cytotoxic phenotype of LIGHT-deficient T cells. *MAbs* **8**, 478-490  
1192 (2016).
- 1193 85. Yu, K.Y. *et al.* A newly identified member of tumor necrosis factor receptor superfamily (TR6)  
1194 suppresses LIGHT-mediated apoptosis. *J Biol Chem* **274**, 13733-13736 (1999).
- 1195 86. Chang, Y.C. *et al.* Epigenetic control of MHC class II expression in tumor-associated  
1196 macrophages by decoy receptor 3. *Blood* **111**, 5054-5063 (2008).
- 1197 87. Aass, K.R., Kastnes, M.H. & Standal, T. Molecular interactions and functions of IL-32. *J Leukoc*  
1198 *Biol* **109**, 143-159 (2021).
- 1199 88. Ribeiro-Dias, F. & Oliveira, I.B.N. A Critical Overview of Interleukin 32 in Leishmaniasis. *Front*  
1200 *Immunol* **13**, 849340 (2022).
- 1201 89. Choi, J.D. *et al.* Identification of the most active interleukin-32 isoform. *Immunology* **126**,  
1202 535-542 (2009).
- 1203 90. Wallimann, A. & Schenk, M. IL-32 as a potential biomarker and therapeutic target in skin  
1204 inflammation. *Front Immunol* **14**, 1264236 (2023).

- 1205 91. Moulik, S. *et al.* Monitoring of Parasite Kinetics in Indian Post-Kala-azar Dermal  
1206 Leishmaniasis. *Clin Infect Dis* **66**, 404-410 (2018).
- 1207 92. Sundar, S. & Rai, M. Laboratory diagnosis of visceral leishmaniasis. *Clin Diagn Lab Immunol* **9**,  
1208 951-958 (2002).
- 1209 93. de Bruijn, M.H. & Barker, D.C. Diagnosis of New World leishmaniasis: specific detection of  
1210 species of the *Leishmania braziliensis* complex by amplification of kinetoplast DNA. *Acta*  
1211 *Trop* **52**, 45-58 (1992).
- 1212 94. Celeste, B.J., Angel, S.O., Castro, L.G., Gidlund, M. & Goto, H. *Leishmania infantum* heat  
1213 shock protein 83 for the serodiagnosis of tegumentary leishmaniasis. *Braz J Med Biol Res* **37**,  
1214 1591-1593 (2004).
- 1215 95. de Oliveira, A.P. *et al.* Comparison of flow cytometry and indirect immunofluorescence assay  
1216 in the diagnosis and cure criterion after therapy of American tegumentary leishmaniasis by  
1217 anti-live *Leishmania (Viannia) braziliensis* immunoglobulin G. *J Immunol Methods* **387**, 245-  
1218 253 (2013).
- 1219 96. Mao, S., Zhang, Y., Seelig, G. & Kannan, S. CellMeSH: probabilistic cell-type identification  
1220 using indexed literature. *Bioinformatics* **38**, 1393-1402 (2022).
- 1221 97. Dos Santos, J.C. *et al.* Cytokines and microbicidal molecules regulated by IL-32 in THP-1-  
1222 derived human macrophages infected with New World *Leishmania* species. *PLoS Negl Trop*  
1223 *Dis* **11**, e0005413 (2017).
- 1224
- 1225
