# Supplementary material for: IL-32 producing CD8+ memory T cells and Tregs define the IDO1 / PD-L1 niche in human cutaneous leishmaniasis skin lesions
Source: bioRxiv or medRxiv preprint supplement (doi:10.1101/2024.01.02.23300281), 2024-01-03
Supplement: Supplementary file [file media-1.pdf]

**Table 1 : Demographics of Sri Lankan cutaneous leishmaniasis (CL; *L. donovani*) patients**

| PID | Age range | Gender | Duration of lesion in months | Comments                                                                    | Amastigote grade | SSS      | PCR                | Amastin (by RNA-FISH) | Treatment response at the end of treatment           | total SSG doses for cure |
|-----|-----------|--------|------------------------------|-----------------------------------------------------------------------------|------------------|----------|--------------------|-----------------------|------------------------------------------------------|--------------------------|
| P1  | >60       | M      | 2                            | Primary lesion on right arm. Three more on right arm, chest, and back       | 3+               | Positive | Positive           | Positive              | Complete cure                                        | 10                       |
| P2  | 46-60     | F      | 8                            | Primary lesion on left scapular area                                        | 1+               | Positive | Positive           | Positive              | Complete cure                                        | 17                       |
| P3  | 46-60     | M      | 5                            | Primary lesion on right shoulder, another lesion on right arm               | 2+               | Positive | Positive           | Positive              | Complete cure                                        | 7                        |
| P4  | 31-45     | M      | 9                            | Primary lesion on left arm                                                  | 2+               | Positive | Positive           | Positive              | Complete cure                                        | 21                       |
| P5  | 0-30      | M      | 25                           | Primary lesion on left forearm                                              | 0                | Negative | Positive           | Positive              | Complete cure                                        | 7                        |
| P6  | 46-60     | F      | 3                            | Primary lesion on right upper neck, another on right shoulder               | 5+               | Positive | Positive           | Positive              | Not completely healed. Still on treatment at 6 mo FU | 29                       |
| P7  | 0-30      | M      | 3                            | Primary lesion on jaw . Three more on chin and forearm.                     | 5+               | Positive | Positive           | Negative              | Complete cure                                        | 5                        |
| P8  | 46-60     | M      | 37                           | Primary lesion on right forearm                                             | 0                | Negative | Positive (Faintly) | Negative              | Complete cure                                        | 12                       |
| P9  | 46-60     | M      | 4                            | Primary lesion on left arm                                                  | 0                | Negative | Positive (Faintly) | Negative              | Complete cure                                        | 10                       |
| P10 | 31-45     | M      | 13                           | Primary lesion on left elbow                                                | 1+               | Positive | Positive           | Negative              | Complete cure                                        | 6                        |
| P11 | 31-45     | F      | 7                            | Primary lesion on right shoulder                                            | 1+               | Positive | Positive (Faintly) | Negative              | Complete cure                                        | 6                        |
| P12 | 31-45     | M      | 7                            | Primary lesion on left hand                                                 | 4+               | Positive | Positive           | Positive              | Complete cure                                        | 8                        |
| P13 | 31-45     | M      | 3                            | Primary lesion on right upper back, another on right hand.                  | 2+               | Positive | Positive           | Negative              | Complete cure                                        | 9                        |
| P14 | 46-60     | M      | 13                           | Primary lesion on left forearm                                              | 2+               | Positive | Positive           | Negative              | Complete cure                                        | 16                       |
| P15 | 31-45     | F      | 2                            | Primary lesion on left leg, another on right ankle                          | 2+               | Positive | Positive           | Negative              | Complete cure                                        | 12                       |
| P16 | 46-60     | M      | 6                            | Primary lesion on right forearm                                             | 5+               | Positive | Positive           | Negative              | Complete cure                                        | 13                       |
| P17 | 31-45     | M      | 8                            | Primary lesion on right forearm                                             | 0                | Negative | Positive           | Negative              | Complete cure                                        | 12                       |
| P18 | 31-45     | M      | 6                            | Primary lesion on right forearm                                             | 0                | Negative | Positive           | Negative              | Complete cure                                        | 9                        |
| P19 | 46-60     | M      | 4                            | Primary lesion on back of the neck                                          | 1+               | Positive | Positive           | Negative              | Complete cure                                        | 6                        |
| P20 | 46-60     | M      | 4                            | Primary lesion on right arm, another on right back abdomen                  | 0                | Negative | Positive (Faintly) | Negative              | Complete cure                                        | 15                       |
| P21 | >60       | M      | 3                            | Primary lesion on left leg, another on left leg lower anterior              | 0                | Negative | Positive           | Negative              | Complete cure                                        | 10                       |
| P22 | 31-45     | F      | 3                            | Primary lesion on left arm                                                  | 2+               | Positive | Positive           | Negative              | Complete cure                                        | 9                        |
| P23 | >60       | M      | 2                            | Primary lesion on left leg and another on left cheek                        | 2+               | Positive | Positive           | Negative              | Complete cure                                        | 4                        |
| P24 | 46-60     | M      | 5                            | Primary lesion on right arm and two more on right shoulder and left forearm | 2+               | Positive | Positive           | Negative              | Complete cure                                        | 26                       |
| P25 | 0-30      | M      | 4                            | Primary lesion on left forearm                                              | 2+               | Positive | Positive           | Negative              | Complete cure                                        | 12                       |

**Table 2 : Demographics of Brazilian cutaneous leishmaniasis (CL; *L. braziliensis*) patients**

| PID | Age range | Gender | Lesion size mm2 | Lesion duration (in months) | Dx PCR | Dx IIF | Dx ELISA | Treatment; route                                  | Duration of therapy | t/t visual score BT | t/t visual score 1 week | t/t visual score 2 week | t/t visual score 3 week | t/t visual score 4 week | t/t visual score 3 months | t/t visual score 6 months |
|-----|-----------|--------|-----------------|-----------------------------|--------|--------|----------|---------------------------------------------------|---------------------|---------------------|-------------------------|-------------------------|-------------------------|-------------------------|---------------------------|---------------------------|
| P1  | 46-60     | F      | 2400            | 3 months                    | PCR +  | -      | +        | liposomal amphotericin B; systemic                | 10 days             | 10                  | 10                      | 10                      | 10                      | 9                       | 5                         | 2                         |
| P2  | 31-45     | M      | 1225            | 2 months                    | PCR +  | +      | +        | Glucantime (meglumine antimoniate); systemic      | 21 days             | 10                  | 10                      | 10                      | 5                       | 3                       | 0                         | 0                         |
| P3  | 31-45     | M      | 5525            | 6 months                    | PCR +  | +      | +        | Glucantime (meglumine antimoniate); systemic      | 20 days             | 10                  | 10                      | 8                       | 8                       | 8                       | 0                         | 0                         |
| P4  | >60       | M      | 750             | 6 months                    | PCR+   | -      | +        | Glucantime (meglumine antimoniate); intralesional | 4 weeks             | 10                  | 10                      | 8                       | 8                       | 8                       | 5                         | 0                         |

**Table 3 : Demographics of Indian post kala-azar leishmniasis (PKDL;*L. donovani*) patients**

| PID | Age range | Gender | lesion duration | History of VL | Year of VL | Treatment during VL | Year of PKDL | Lag period (in years) | Lesion type | DX ITS-1 PCR |
|-----|-----------|--------|-----------------|---------------|------------|---------------------|--------------|-----------------------|-------------|--------------|
| P1  | 0-30      | M      | 3 years         | Yes           | 2010       | SAG                 | 2016         | 6                     | Polymorphic | Positive     |
| P2  | 31-45     | M      | 8 years         | Yes           | 1989       | SAG                 | 2013         | 24                    | Macular     | Positive     |
